# Supplementary material for: Make My Day: primary prevention of stroke using engaging everyday activities as a mediator of sustainable health – a randomised controlled trial and process evaluation protocol
Source: PubMed Central journal article supplement (PMC10711911; doi:10.1136/bmjopen-2023-072037), 2023-12-06
Supplement: bmjopen-2023-072037.draft_revisions.pdf [file bmjopen-2023-072037.draft_revisions.pdf]

# BMJ Open

BMJ Open is committed to open peer review. As part of this commitment we make the peer review history of every article we publish publicly available.

When an article is published we post the peer reviewers' comments and the authors' responses online. We also post the versions of the paper that were used during peer review. These are the versions that the peer review comments apply to.

The versions of the paper that follow are the versions that were submitted during the peer review process. They are not the versions of record or the final published versions. They should not be cited or distributed as the published version of this manuscript.

BMJ Open is an open access journal and the full, final, typeset and author-corrected version of record of the manuscript is available on our site with no access controls, subscription charges or pay-per-view fees (<http://bmjopen.bmj.com>).

If you have any questions on BMJ Open's open peer review process please email [info.bmjopen@bmj.com](mailto:info.bmjopen@bmj.com)

# BMJ Open

## **Make My Day: Primary prevention of stroke using engaging everyday activities as a mediator of sustainable health—a randomised controlled trial and process evaluation protocol**

|                               |                                                                                                                                                                                                                                                                                                                                                                                                                                                                                                                                                                                                                                                                                                                                                                                                                                                                                                                                                                                                                                                                                     |
|-------------------------------|-------------------------------------------------------------------------------------------------------------------------------------------------------------------------------------------------------------------------------------------------------------------------------------------------------------------------------------------------------------------------------------------------------------------------------------------------------------------------------------------------------------------------------------------------------------------------------------------------------------------------------------------------------------------------------------------------------------------------------------------------------------------------------------------------------------------------------------------------------------------------------------------------------------------------------------------------------------------------------------------------------------------------------------------------------------------------------------|
| Journal:                      | <i>BMJ Open</i>                                                                                                                                                                                                                                                                                                                                                                                                                                                                                                                                                                                                                                                                                                                                                                                                                                                                                                                                                                                                                                                                     |
| Manuscript ID                 | bmjopen-2023-072037                                                                                                                                                                                                                                                                                                                                                                                                                                                                                                                                                                                                                                                                                                                                                                                                                                                                                                                                                                                                                                                                 |
| Article Type:                 | Protocol                                                                                                                                                                                                                                                                                                                                                                                                                                                                                                                                                                                                                                                                                                                                                                                                                                                                                                                                                                                                                                                                            |
| Date Submitted by the Author: | 20-Jan-2023                                                                                                                                                                                                                                                                                                                                                                                                                                                                                                                                                                                                                                                                                                                                                                                                                                                                                                                                                                                                                                                                         |
| Complete List of Authors:     | <p>Patomella, Ann-Helen; Karolinska Institutet, Department of Neurobiology, Care Sciences and Society; Academic Primary Health Care Centre</p> <p>Guidetti, Susanne; Karolinska Institutet, Department of Neurobiology, Care Sciences and Society; Karolinska University Hospital</p> <p>Hagströmer, Maria; Karolinska Institute, Department of Neurobiology Care Sciences and society; Academic Primary Health Care Centre</p> <p>Olsson, Christina; Academic Primary Health Care Centre, ; Karolinska Institutet, Department of Neurobiology, Care Sciences and Society</p> <p>Jakobsson, E; Karolinska Institutet, Department of Neurobiology, Care Sciences and Society</p> <p>Nilsson, Gunnar; Academic Primary Health Care Centre; Karolinska Institutet, Department of Neurobiology, Care Sciences and Society</p> <p>Åkesson, Elisabet; Karolinska Institutet, Department of Neurobiology, Care Sciences and Society; Stockholms Sjukhem FoUU</p> <p>Asaba, Eric; Karolinska Institutet, Department of Neurobiology, Care Sciences and Society; Stockholms Sjukhem FoUU</p> |
| Keywords:                     | Stroke < NEUROLOGY, PREVENTIVE MEDICINE, REHABILITATION MEDICINE                                                                                                                                                                                                                                                                                                                                                                                                                                                                                                                                                                                                                                                                                                                                                                                                                                                                                                                                                                                                                    |
|                               |                                                                                                                                                                                                                                                                                                                                                                                                                                                                                                                                                                                                                                                                                                                                                                                                                                                                                                                                                                                                                                                                                     |

SCHOLARONE™  
Manuscripts

1  
2  
3  
4 **Make My Day: Primary prevention of stroke using engaging everyday activities as a**  
5 **mediator of sustainable health—a randomised controlled trial and process evaluation**  
6 **protocol**  
7  
8  
9

10 Patomella Ann-Helen, [ann-helen.patomella@ki.se](mailto:ann-helen.patomella@ki.se), (ORCID 0000-0003-2667-4073)<sup>1</sup>,

11  
12 2

13  
14 Guidetti Susanne, [Susanne.guidetti@ki.se](mailto:Susanne.guidetti@ki.se), (ORCID 0000-0001-6878-6394)<sup>1,3</sup>

15  
16 Hagströmer Maria, [maria.hagstromer@ki.se](mailto:maria.hagstromer@ki.se), (ORCID 0000-0002-4607-8677)<sup>1, 2</sup>

17  
18 Olsson Christina B, [christina.b.olsson@regionstockholm.se](mailto:christina.b.olsson@regionstockholm.se), (0000-0003-1300-7765)

19  
20 2,4

21  
22 Jakobsson Elin, [elin.jakobsson@ki.se](mailto:elin.jakobsson@ki.se), (ORCID 0000-0001-9756-1354)<sup>1</sup>

23  
24 Nilsson Gunnar, [gunnar.nilsson@ki.se](mailto:gunnar.nilsson@ki.se), (ORCID 0000-0001-7811-7602)<sup>2,5</sup>

25  
26 Åkesson Elisabet, [elisabet.akesson@ki.se](mailto:elisabet.akesson@ki.se), (ORCID 0000-0002-8227-9118)<sup>6,7</sup>

27  
28 Asaba Eric, [eric.asaba@ki.se](mailto:eric.asaba@ki.se), (ORCID 0000-0002-6910-3468)<sup>1,7</sup>

29  
30 Affiliation:

31  
32 <sup>1</sup>Department of Neurobiology, Care Sciences and Society, Division of Occupational  
33 Therapy, Karolinska Institutet, Stockholm, Sweden

34  
35 <sup>2</sup> Academic Primary Health Care Centre, Region Stockholm, Stockholm, Sweden

36  
37 <sup>3</sup> Women's Health and Allied Health Professionals Theme, Medical Unit Occupational  
38 therapy and Physiotherapy, Karolinska University Hospital

39  
40 <sup>4</sup> Department of Neurobiology, Care Sciences and Society, Division of Physiotherapy  
41 Therapy, Karolinska Institutet, Stockholm, Sweden

42  
43 <sup>5</sup> Department of Neurobiology, Care Sciences and Society, Division of Family  
44 Medicine and Primary Care, Karolinska Institutet, Stockholm, Sweden

45  
46 <sup>6</sup> Department of Neurobiology, Care Sciences and Society, Division of  
47 Neurogeriatrics, Karolinska Institutet, Stockholm, Sweden

48  
49 <sup>7</sup> R&D Unit, Stockholms Sjukhem, Stockholm, Sweden

**Corresponding author:**

Ann-Helen Patomella, Department of Neurobiology, Care Sciences and Society, Division of Occupational Therapy, Karolinska Institutet, Stockholm, Sweden

Email address: ann-helen.patomella@ki.se

Phone number: +46 852483726

\* I, the Submitting Author has the right to grant and does grant on behalf of all authors of the Work (as defined in the below author licence), an exclusive licence and/or a non-exclusive licence for contributions from authors who are: i) UK Crown employees; ii) where BMJ has agreed a CC-BY licence shall apply, and/or iii) in accordance with the terms applicable for US Federal Government officers or employees acting as part of their official duties; on a worldwide, perpetual, irrevocable, royalty-free basis to BMJ Publishing Group Ltd ("BMJ") its licensees and where the relevant Journal is co-owned by BMJ to the co-owners of the Journal, to publish the Work in BMJ Open and any other BMJ products and to exploit all rights, as set out in our licence.

The Submitting Author accepts and understands that any supply made under these terms is made by BMJ to the Submitting Author unless you are acting as an employee on behalf of your employer or a postgraduate student of an affiliated institution which is paying any applicable article publishing charge ("APC") for Open Access articles. Where the Submitting Author wishes to make the Work available on an Open Access basis (and intends to pay the relevant APC), the terms of reuse of such Open Access shall be governed by a Creative Commons licence – details of these licences and which Creative Commons licence will apply to this Work are set out in our licence referred to above.

**Word count:** 3999

**Protocol version:** 18<sup>th</sup> of January 2023. Version 1.0

**Trial Registration number:** ClinicalTrials.gov Identifier: NCT05279508

## **Abstract**

### Introduction

The individual, societal and economic benefits of stroke prevention are high. Even though most risk factors can be reduced by changes to lifestyle habits, maintaining new and healthy activity patterns has been shown to be challenging.

The aim of the study is to evaluate the impact of an interdisciplinary team-based, mHealth-supported prevention intervention in primary health care (PHC). The intervention is mediated by engaging everyday activities that promote health. An additional aim is to describe a process evaluation that serves to increase knowledge about how the program leads to potential change by studying the implementation process and mechanisms of impact.

### Methods and analysis

The study will be a randomised controlled trial including 104 persons at risk for stroke. Persons at risk of stroke (n =52) will be randomised to an mHealth-supported stroke prevention program. Controls will have ordinary PHC services. The 10-week programme will be conducted at PHC clinics, combining group meetings and online resources to support self-management of lifestyle change using engaging everyday activities as a mediator. Primary outcomes are stroke risk, lifestyle habits, and participation in health-promoting activities. Assessments will be performed at baseline and at follow-up (11 weeks and 12 months). Effects of the programme will be analysed using inferential statistics. Implementation will be analysed using qualitative and quantitative methods.

### Ethics and dissemination

The study has been approved by the Swedish Ethical Review Authority. Study results will be disseminated in peer-reviewed journals and at regional and international conferences targeting mixed audiences.

## Article Summary

### Strengths of this study

- The robust randomised controlled trial (RCT) design, investigating the effects of the intervention programme for persons at risk of stroke.
- A process evaluation will provide rich data, useful for analysing the outcomes and the research process and for implementation in primary health care.
- The utilisation of engaging everyday activities as a mediator and goal for sustainable lifestyle change.

### Limitations of this study

- A limitation is that primary outcomes are based on self-reported data. Therefore, a physical activity monitoring device will be used to track movement and activity.
- One of the inclusion criteria is motivation, which can skew the results and lower external validity.

## **Abstract**

### Introduction

The individual, societal and economic benefits of stroke prevention are high. Even though most risk factors can be reduced by changes to lifestyle habits, maintaining new and healthy activity patterns has been shown to be challenging.

The aim of the study is to evaluate the impact of an interdisciplinary team-based, mHealth-supported prevention intervention in primary health care (PHC). The intervention is mediated by engaging everyday activities that promote health. An additional aim is to describe a process evaluation that serves to increase knowledge about how the program leads to potential change by studying the implementation process and mechanisms of impact.

### Methods and analysis

The study will be a randomised controlled trial including 104 persons at risk for stroke. Persons at risk of stroke (n =52) will be randomised to an mHealth-supported stroke prevention program. Controls will have ordinary PHC services. The 10-week programme will be conducted at PHC clinics, combining group meetings and online resources to support self-management of lifestyle change using engaging everyday activities as a mediator. Primary outcomes are stroke risk, lifestyle habits, and participation in health-promoting activities. Assessments will be performed at baseline and at follow-up (11 weeks and 12 months). Effects of the programme will be analysed using inferential statistics. Implementation will be analysed using qualitative and quantitative methods.

### Ethics and dissemination

The study has been approved by the Swedish Ethical Review Authority. Study results will be disseminated in peer-reviewed journals and at regional and international conferences targeting mixed audiences.

## Article Summary

### Strengths of this study

- The robust randomised controlled trial (RCT) design, investigating the effects of the intervention programme for persons at risk of stroke.
- A process evaluation will provide rich data, useful for analysing the outcomes and the research process and for implementation in primary health care.
- The utilisation of engaging everyday activities as a mediator and goal for sustainable lifestyle change.

### Limitations of this study

- A limitation is that primary outcomes are based on self-reported data. Therefore, a physical activity monitoring device will be used to track movement and activity.
- One of the inclusion criteria is motivation, which can skew the results and lower external validity.



## INTRODUCTION

In Sweden, a health care reform programme entitled “Good Quality Local Health Care—Primary Care Reform” (1) is currently paving the way for a large-scale transformation. The reform targets primary health care (PHC) specifically, and is designed to proactively address and prevent illness at an early stage to reduce the burden of non-communicable diseases (NCD), like stroke. The reform is in line with the United Nations Sustainable Development Goals, urging governments to reduce premature mortality from NCDs by 1/3 by year 2030 through prevention and treatment (2). By the age of 55, the risk for stroke increases considerably and doubles each decade afterward (3,4). Although the incidence of stroke has decreased in the general population, trends show an increase in stroke incidence in young adults (5). In Sweden, stroke incidence has declined by over 40% the last 15 years (6). However, both globally and in Sweden, cerebrovascular diseases like stroke continue to be the most common cause of death and impairment (7).

The individual, societal, and economic benefits of stroke prevention are high. Many of the stroke risk factors are largely addressable; e.g., smoking, obesity, type 2 diabetes, hypertension, physical inactivity, and dietary intake. The benefits of a healthy lifestyle are clear (4,8), however, the long-term effect of lifestyle interventions are not (9,10). For example, the effectiveness of PHC-based physical activity interventions is inconclusive (11). There is evidence for short-term improvements, but there is a lack of evidence for long-term effects (9). A multi-factorial approach to stroke prevention is warranted. A systematic review showed that multifactorial lifestyle habit interventions have greater potential effect on reducing risk factors than single-factor interventions (12). Preliminary evidence exists from a Swedish trial on a multifactorial lifestyle counselling program (13) that improved physical activity and dietary habits and reduced smoking and stress; however, the study was not conducted in PHC and did not have a control group. mHealth (a term for the combination of eHealth services and smartphone technology (14)) presents possibilities for accessibility and affordability when developing health services (15, 16) making it an excellent tool for designing stroke prevention models (17).

### Theoretical concept of the intervention program

1  
2  
3 The program is a complex intervention, and the Medical Research Council (MRC)  
4 guidance for developing and evaluating complex interventions (18) has been utilised  
5 in the design of the study. MRC suggest several key elements and stages;  
6  
7 Development, Feasibility/piloting, Evaluation, and Implementation. This randomised  
8 controlled trial (RCT) evaluates the effectiveness and implementation of the Make My  
9 Day (MMD) programme, and is based on already-completed or ongoing studies  
10 concerning development and feasibility.  
11  
12  
13  
14  
15  
16

### 17 *Engaging everyday activity*

18 In the MMD programme, engaging everyday activities (EEA) are seen as the means  
19 and goal for changing and sustaining a healthy lifestyle in the intervention program,  
20 and while it is not a new concept, it has not been studied in relation to changing  
21 lifestyle habits to prevent NCDs. EEA is defined as a special type of activity that: is  
22 based on individual experience, filled with meaning, and gives a sense of intense  
23 participation and enthusiasm to the individual (19, 20). Examples from previous  
24 studies show that EEA can include a variety of activities such as working, playing  
25 computer games, and reading books. We recently showed that an intervention  
26 programme targeting cardiovascular disease prevention could benefit from  
27 incorporating health promoting EEA (21). The complexity of changing lifestyle habits  
28 has been described as a paradox between EEA and health (22). Even though EEA is  
29 subjectively meaningful and engaging to an individual, it might have an arguably  
30 negative impact on health; for example, engagement in sedentary activity or in  
31 unhealthy behaviours (22). In the current project, EEAs are seen as having the  
32 potential to change everyday activity patterns, and when carefully designed (for  
33 example, listening to an audiobook while taking a walk), incorporate a routine that  
34 promotes sustainable health among persons at risk for stroke. Studies have shown  
35 that promoting EEAs can have positive health impacts for older adults (23–25).  
36 Studies on populations that live lives that incorporate EEAs combined with moderate-  
37 intensity physical activities and a healthy diet indicate a strong relation to wellbeing,  
38 longevity, and cultural context (4,5).  
39  
40  
41  
42  
43  
44  
45  
46  
47  
48  
49  
50  
51  
52  
53  
54

55  
56 Current state-of-the art in stroke prevention suggest the need for a multifactorial PHC  
57 intervention that address modifiable risk factors for stroke based on individual needs  
58  
59  
60

1  
2  
3 and engagement in everyday activities that promote health with the support of a  
4 mHealth service.  
5  
6

### 7 **Objectives of the proposed study**

8  
9 The main aim of the study is to evaluate the impact of an inter-disciplinary team-  
10 based, mHealth-supported prevention intervention in primary health care (PHC) —  
11 mediated with engaging everyday activities that promote health—to decrease stroke  
12 risk (primary outcome), and increase participation in engaging everyday activities and  
13 Health Related Quality of Life (HRQoL). The aim is also to describe a process  
14 evaluation that serves to increase knowledge about how the program leads to  
15 potential change by studying the implementation process and mechanisms of impact.  
16  
17  
18  
19  
20  
21  
22

### 23 **Hypothesis**

24 We hypothesise that the Make My Day (MMD) intervention programme is more  
25 beneficial than regular PHC services (control group) in decreasing stroke risk  
26 (primary outcome). We also hypothesised that MMD is more beneficial than regular  
27 PHC in increasing a) participation in health promoting EEAs, and b) HRQoL.  
28  
29  
30  
31  
32  
33

## 34 **METHODS AND ANALYSIS**

### 35 **Design**

36  
37 The study will be a randomised, assessor-blinded, controlled trial of persons at risk  
38 for stroke. The process evaluation answers questions as to what interventions were  
39 delivered and how by combining qualitative interviews and descriptive quantitative  
40 data on the implementation, casual mechanisms, and contextual variation (26).  
41  
42  
43  
44  
45

### 46 **Study setting**

47 The study will be conducted in close collaboration with four PHC clinics in the  
48 Stockholm area (different parts of Stockholm to represent a diversity in geographical  
49 area). PHC clinics in this study are rehabilitation units involving dietitians,  
50 physiotherapists, and occupational therapists. In Region Stockholm, rehabilitation  
51 units are often both organisationally and geographically separate from general  
52 practitioner (GP) primary health care clinics. These primary health care rehabilitation  
53 units have an agreement with the County Council in Stockholm, and are available for  
54 patients to choose from without the need of a referral for treatment by certified  
55  
56  
57  
58  
59  
60

1  
2  
3 physiotherapists, occupational therapists, and dieticians. PHC services are publicly  
4 funded in Sweden.  
5  
6

### 7 **Sample size and power considerations**

8  
9 The primary outcome is stroke risk. Based on data from a case study (27), we  
10 calculate a decrease of at least one level of stroke risk (e.g., moving from high risk to  
11 medium risk in the Stroke Risk Score Card (28)) with a standard deviation of 1.5,  
12 statistical power of 80%, with two-tailed  $\alpha = 0.05$ . Under these assumptions, the  
13 required sample size was 35 in each group. The Stroke Risk Score Card was  
14 developed as an easy-to-use self-assessment tool by the National Stroke Association  
15 in the United Kingdom (28). The tool has been used previously in a few studies to  
16 detect risk factors of stroke (27,28) and in a recently-finished pilot study conducted in  
17 the research group (publication in manuscript). Since the Stroke Risk Score Card has  
18 not been sufficiently tested psychometrically, power calculations were added for  
19 participation in EEAs, and a newly developed assessment tool for stroke risk was  
20 added as a primary outcome measure (not possible to use in power calculations,  
21 since no previous data were available). Power to detect a clinically important  
22 difference on participation (performance and satisfaction) in EEAs of two points (as  
23 measured with the Canadian Occupational Performance Measure, COPM (29)),  
24 requires 40 participants in each group. To safeguard against dropouts (a maximum  
25 30% dropout rate is assumed), 104 participants will be enrolled. In total, five groups  
26 (at 3-4 different PHC clinics), each consisting of approximately 10–12 participants will  
27 receive the prevention program.  
28  
29  
30  
31  
32  
33  
34  
35  
36  
37  
38  
39  
40  
41  
42  
43

### 44 **Participants: Recruitment and eligibility criteria**

45  
46 Persons at risk of stroke will be included in the project and participants will be  
47 recruited via advertisements in social media, a webpage, and flyers at PHCs. A  
48 stroke risk online screening survey will be used to find eligible participants. Inclusion  
49 criteria for the study are a) three or more risk factors deemed 'high risk' using the  
50 Stroke Risk Score Card, b) motivation for lifestyle change and to participate in a  
51 digital lifestyle intervention (including use of a smart phone), d) aged between 55–75  
52 years old, and without a diagnosis of dementia or cognitive impairment hindering  
53 participation. Exclusion criteria include having previously had a stroke or a trans-  
54 ischemic attack diagnosis, lack of understanding of the Swedish language, and not  
55  
56  
57  
58  
59  
60

1  
2  
3 being able to use a mobile phone application. A total sample of n =104 participants  
4 (persons at risk of stroke), divided into two arms (52+52) for intervention and controls  
5 is estimated. Block randomisation will be utilised with a block size of four (25).  
6  
7 Allocation will be done following baseline assessment by a researcher not involved in  
8 data collection nor intervention. The assessors of outcomes will be blinded to  
9 allocation until the end of the study.  
10  
11  
12  
13  
14

15 In addition, next of kin to persons at risk for stroke are also invited to answer  
16 questions (survey and group interview) regarding support of their relative and of their  
17 own health. Persons at risk for stroke who do not have a next of kin to answer the  
18 survey will not be excluded. PHC professionals that have been trained and delivered  
19 the interventions programme will be additional participants in the process evaluation  
20 of the study. Stakeholders (such as leaders at the involved PHC clinics) will be  
21 invited to individual interviews.  
22  
23  
24  
25  
26  
27  
28

### 29 **Informed consent**

30 Written informed consent will be obtained from all participants (persons at risk, their  
31 next of kin, and PHC staff and stakeholders) at the start of recruitment. Information  
32 about the study will be given in written and verbal forms during meetings with  
33 research staff. Persons at risk will be asked to identify a next of kin that will be asked  
34 to participate by the researchers.  
35  
36  
37  
38  
39  
40

### 41 **Make My Day—a stroke-prevention program**

42 The MMD intervention program enables healthy activity patterns and aims to reduce  
43 the risk of stroke by means of four strategies: a) the incorporation of health-promoting  
44 EEAs, b) the use of mobile phone technology (mHealth) to increase health literacy,  
45 and awareness of current habits and fostering self-management, c) setting realistic  
46 goals that form new habits that prompt conscious decisions for healthy choices and  
47 habits, and d) sharing experience in a learning environment.  
48  
49  
50  
51  
52  
53  
54

### 55 *Duration and specific content of the intervention programme*

56 The MMD stroke intervention programme is a 10-week group programme consisting  
57 of five sessions over the first five weeks, followed by a sixth booster session five  
58 weeks later. During the intervention, participants will work actively on self-chosen  
59  
60

goals, EEAs, and habits to change behaviour and lifestyle. A mobile phone app will be used by participants throughout the 10 weeks, supporting their awareness of current lifestyle habits and everyday activities. To form new habits, common situations will be used to cue behaviour change, like seeing an elevator and looking for the staircase, prompting health-promoting behaviour, and making a conscious decision to walk the stairs (30). The continuation of a change process is expected from the participants following the 10-week program period, and strategies for self-management are anticipated.

Each session (90 min) has a theme and includes some type of activity such as exercise, making a light snack, or taking a walk. Group dynamics and personal experience are used to reflect on EEAs in relation to health, doing and future goals. The sessions and content, presented in Table 1, are delivered by a trained health professional; for example an occupational therapist, physiotherapist, or dietician.

The health care professionals who will provide the MMD program/intervention will participate in structured education specially designed for this program. This education will be given in an on-site and digital combination on three occasions, and will be held by two research team members with extensive experience in pedagogy and in the research protocol. In addition, the health professionals will have access to a digital educational platform with rich and varied material, and all material to be used during the 10-week programme. To avoid contamination, the health professionals are instructed to not deliver the 10-week program to other patients during the research period.

Table 1: Summary of session themes, concepts, and activities supporting a change process

| Week | Session theme                                               | Profession             | Concepts                                                                                  | Activity                                                                |
|------|-------------------------------------------------------------|------------------------|-------------------------------------------------------------------------------------------|-------------------------------------------------------------------------|
| 1    | 1: Risk factors for stroke and engaging everyday activities | Occupational therapist | Health literacy concerning stroke risk, engaging activities, change process, expectations | Peer interview on engaging activities. Learn how to register in the app |
| 2    | 2: Physical activity                                        | Physiotherapist        | Physical activity, physical inactivity                                                    | Try a physical group exercise class at a gym                            |
| 3    | 3: Diet and health                                          | Dietician              | Dietary routines and change                                                               | Food lab—prepare and test; e.g., healthy snacks/sandwiches              |

|    |                                                                   |                         |                                                                                                                             |                                                                  |
|----|-------------------------------------------------------------------|-------------------------|-----------------------------------------------------------------------------------------------------------------------------|------------------------------------------------------------------|
| 4  | 4: Balanced everyday life                                         | Occupational therapist  | Activity balance and stressors                                                                                              | Relaxation—such as medical yoga or meditation                    |
| 5  | 5: The meaning of healthy habits, routines, and activity patterns | One of the team members | Current and desired routines/habits, activity patterns and resources                                                        | Walk-and-talk—e.g., in a forest or a historical walk in the city |
| 10 | 6: Booster session: Evaluation and the road ahead                 | Occupational therapist  | Self-management, sustainability, view of the self, social support, revisiting goals/new goals, and social aspects of health | Preparing healthy snacks and group reflection on the program     |

### *The mobile phone app*

The app for the pilot project was produced collaboration with ScientificMed Tech AB (now part of Cuviva AB) (<http://www.scientificmed.com>), and for the current project the app has been modified based on previous experiences of the users and the researchers. A workshop with the pilot study participants, researchers and the company showed that the participants wanted the app to be more tailored to their needs with a more user-friendly interface. Both the researchers and the users wanted feedback to be relevant and tailored to the users progress thus supporting change and awareness. As with the previous version, the new version of the app includes six domains for registering daily activities, experiences, and behaviours (see Figure 1 for examples from the app): my goals (goal achievements on three pre-set goals); physical activity and steps (step counts, 24-hour time use in relation to exercise, moderately intense activities, sleep, sedentary activities, and other activities); engaging activities (participating in health-promoting EEAs); tobacco and alcohol use (consumption); stress (perceived time-pressure); and dietary habits (consumption of fruits/vegetables, breakfast, fish and snacks—not included in the figure). Domains are based on modifiable risk factors for stroke, as presented by the American Heart Association (3), with the addition of health-promoting EEAs and stress reduction.

-Insert Figure 1 here

### **Data collection**

#### *Persons at risk for stroke*

Data collection with a research assistant starts with an individual meeting (baseline) with all eligible participants, just before the meeting (T minus 2 days), during which participants are sent a link to an online survey for collecting self-reported measures.



1  
2  
3 During baseline assessment, all participants (including controls) will be informed of  
4 their stroke risk factors. Motivational interviewing techniques will be used to identify  
5 three problem areas in relation to lifestyle habits and stroke risk factors, and these  
6 areas will be used to formulate three lifestyle change goals. Allocation  
7  
8 (randomisation) will be done following baseline assessment. Allocation sequences  
9  
10 will be done by an independent researcher not involved in data collection or  
11  
12 intervention. The researchers who are assessors of outcomes will be blinded to  
13  
14 allocation until the end of the study. The assessments measuring primary and  
15  
16 secondary outcomes will be collected at baseline, at follow-up (11 weeks), and at 12  
17  
18 months; see Table 2. Demographic data will be collected at baseline. Process data  
19  
20 will be collected continuously. Controls will be offered standard care by PHCs as  
21  
22 needed during the 12 months study period.  
23

### 24 25 *Outcome data*

26  
27 Outcome assessment methods were carefully chosen to assure methods that are  
28  
29 valid and reliable and will capture change. The primary outcome measure is risk for  
30  
31 stroke, measured by the Swedish version of the *Stroke Riskometer* (30,31) and the  
32  
33 *Stroke Risk Score Card* (27, 28). Secondary outcomes include participation in health-  
34  
35 promoting everyday activities, measured by the *Canadian Occupational Performance*  
36  
37 *Measure*, (COPM) (32), and self-rated health measured using *LiSat-11* (33) and *EQ-*  
38  
39 *5D* (34). Other measures are lifestyle habits (measured using the updated *Swedish*  
40  
41 *Lifestyle Survey*, *Levnadsvaneenkäten*) (35), and activity patterns, as measured  
42  
43 using the Swedish version of the *Productivity Pleasure and Restoration Profile* (36,  
44  
45 37). Survey data will be gathered for health literacy of stroke risk (38), experiences of  
46  
47 time pressure (stress), cost effectiveness (e.g., self-reported sick leave; health care  
48  
49 utilisation, and use of medication), readiness and motivation for change (39), current  
50  
51 mobile phone use, and mapping out engaging everyday activities. Habitual physical  
52  
53 activity will be measured using the *activPAL®* micro activity monitor (PAL  
54  
55 Technologies Ltd., Glasgow, UK) (40). The *activPAL* is a small device which provides  
56  
57 information on position and acceleration of the body. The monitor is attached to the  
58  
59 thigh and will be worn for five consecutive days after baseline and at follow-up (11  
60  
weeks and 12 months). Outcomes from the monitor are 1) time spent sitting/lying,  
standing, stepping, 2) numbers of step counts, and 3) sit-to-stand transitions.



### *Outcome data- next of kin*

Data from next of kins to participants in the intervention group will be collected via an online survey after the intervention period. The survey will include demographic measures of health and questions on their view of the program and the support they have given their kin.

### *Process data*

The process evaluation will illuminate casual mechanisms and help identify factors that are associated with variation in outcomes, such as contextual and external factors (26). Process data include both qualitative and quantitative descriptive data, including logbooks from PHC staff (notes taken during delivery of the program), course evaluations from the web-based staff training, and semi-structured exit interviews with participants at risk for stroke and their next of kin, see Table 2. Fidelity will be evaluated as the extent to which the programme was delivered as expected. Dose will be assessed as the quantity of the implemented intervention. Adaptation, such as changes made to fit different PHC settings, will be collected during interviews with PHC staff. Reach will be assessed regarding how many eligible patients signed up and how many completed the MMD program. In addition, adverse events will be registered. Context includes external factors that may act as a barrier or facilitator to the implementation itself and to the interventions' effects. Assessing barriers and facilitators to program implementation will also involve evaluating program feasibility; i.e., the extent to which stakeholders regard the MMD as satisfactory in terms of content and complexity/difficulty.

Data will be managed using an online software called RedCap (<https://www.project-redcap.org/>) in combination with a local data management system.

### *Participant timeline*

Participant enrolment will start in April 2022, and the last groups' 12-month follow-up will occur in March 2024 (marking the end of the study).

Table 2: Summary of measures to be collected

|  | <b>Instrument and scale</b> | <b>Time points</b> |
|--|-----------------------------|--------------------|
|--|-----------------------------|--------------------|

|                                                                  |                                                                                                                            |            |
|------------------------------------------------------------------|----------------------------------------------------------------------------------------------------------------------------|------------|
| <b>Primary outcome measures from persons at risk for stroke:</b> |                                                                                                                            |            |
| Stroke risk                                                      | The Stroke Riskometer*, the Stroke risk score card*                                                                        | t1, t2, t3 |
| <b>Secondary outcome measures:</b>                               |                                                                                                                            |            |
| Participation in everyday activities                             | COPM, PPR profile*                                                                                                         | t1, t2, t3 |
| Physical activity (habitual)                                     | ActivPal                                                                                                                   | t1, t2, t3 |
| Life satisfaction                                                | EQ-5D*, LiSat-11*                                                                                                          | t1, t2, t3 |
| Lifestyle habits                                                 | The Swedish Lifestyle Habits Questionnaire*                                                                                | t1, t2, t3 |
| <b>Demographics and measures:</b>                                |                                                                                                                            |            |
| Age                                                              | Year*                                                                                                                      | t1         |
| Gender                                                           | Male/Female/Other*                                                                                                         | t1         |
| Ethnic background                                                | Mother tongue*, place of birth*                                                                                            | t1         |
| Height                                                           | Cm                                                                                                                         | t1         |
| Weight                                                           | Kg*                                                                                                                        | t1, t2, t3 |
| Living situation                                                 | Living alone or not*                                                                                                       | t1, t3     |
| Yearly income                                                    | In Swedish crona*                                                                                                          | t1, t3     |
| Employment status                                                | Part-time, full-time, sick-leave, unemployed, student, retired*                                                            | t1, t3     |
| Level of education                                               | Years of education*                                                                                                        | t1         |
| Blood pressure                                                   | mmHg                                                                                                                       | t1, t2, t3 |
| Health literacy                                                  | Knowledge of stroke                                                                                                        | t1, t2, t3 |
| Motivation for change                                            | Self-reported, ordinal scale                                                                                               | t1         |
| Cost effectiveness                                               | Self-reported sick-leave and absence from work past six months; health care utilisation past six months; Use of medication | t1, t2, t3 |
| <b>Experiences of next of kin:</b>                               | Self-reported health and support*                                                                                          | t2, t3     |
| <b>Process data:</b>                                             |                                                                                                                            |            |
| Fidelity and adaptations                                         | Interviews with interventionists on delivery of intervention. Log-books from interventionists.                             | t2         |
| Dose                                                             | Log-books from interventionists.                                                                                           | t2         |

t1 =Baseline; t2 =One week following intervention ending; t3 =12 months follow-up post baseline

\* = measures collected via an online survey

## Data Analysis Plan

### *Outcomes on effects*

The characteristics of all persons at risk for stroke at inclusion, and outcomes at 11 weeks and 12 months after inclusion, will be presented with descriptive statistics. The treatment effects in the RCT study will be analysed on an intention-to-treat basis, with randomised participants retaining their original allocated group, and measured as differences between groups at follow-up and at 12 months considering plausible confounders. Outcome data will be examined for outliers, normality, and missing data. Analyses of covariance will be used for continuous outcomes, with baseline values as covariates. Logistic regression analyses will be used for dichotomous outcomes. The level of significance will be set at  $p \leq 0.05$  and the confidence level at 95%. We will use SPSS to analyse the data. Analyses will provide results for the relative effectiveness of the intervention program. The results will be reported accordance to CONSORT recommendations for reporting randomised controlled trials on non-pharmacological treatments (41) and the protocol has been reported according to the SPIRIT reporting guidelines (42).

### *Process evaluation*

A mixed method approach where qualitative and quantitative data is integrated will be used to answer how the implementation process and potential mechanisms of impact can explain the outcomes of the MMD intervention.

Data collected from surveys, logbooks on recruitment and dropout, and logs from the app registrations will be entered, analysed, and summarised. Descriptive statistical analyses will be conducted to report on the study's feasibility: recruitment, drop-outs, retention rate, and adherence. Data from app registrations will be used to report on feasibility and usability. Qualitative interviews will be transcribed verbatim and analysed using thematic qualitative analyses.

## Patient and Public Involvement

Persons at risk for stroke participating in previous studies have been active in the development of material and research processes.

## Discussion

Several NCDs share the same risk factors as stroke, and an intervention program has the potential to address other NCDs and health in general, and should overlap with other health-promoting strategies (3). In the proposed study we will evaluate the MMD program in regard to decreasing stroke risk by using broad strategies and addressing multiple factors of relevance. The theoretical base of the protocol is grounded on EEAs as the mediator and goal for decreasing stroke risk and sustaining personally-relevant healthy living habits. It is important to note that the concept of personal relevance can mean that in a total week of different activities, some engaging activities can potentially be considered unhealthy (i.e., unhealthy eating activity), but the overall pattern of participation in EEA could be designed to include health-promoting EEA as this study promotes. The paradoxicality of EEAs is that the feeling of being engaged can be just as important for health and wellbeing as being physically active (43). Living habits thus needs to be seen as part of a broader life context, in which health and EEAs are continuously renegotiated and thus need to be regularly reassessed within the context of each person's life situation.

During the COVID-19 pandemic there was a strong increase in online primary health care consultations in Sweden, especially for younger patients with high economical and educational backgrounds who were born in Sweden; meanwhile the older population sought less care and preferred face-to-face consultations (44). Although there is a possibility to deliver the MMD intervention programme completely online (no physical meetings), we have decided to run the programme meetings face-to-face. During the 12-month follow-up of the pilot study, which occurred at the end of 2020, participants rated physical meet-ups (the possibility of exchanging experiences with other at-risk persons and group leaders) as highly valued; which is in line with previous studies that showed that a blended intervention approach can be efficient compared to only online or on-site intervention (45). However, whether multiple face-

1  
2  
3 to-face consultations (doses) would be the most efficient is not clear, and is one of  
4 the questions for the process evaluation.  
5  
6  
7

8 The possible limitation of the study will be the reliability of self-reported measures,  
9 and there is a risk of bias since reporting might not be accurate, therefore measures  
10 such as activPAL, BMI, and blood pressure are complementing the assessments.  
11 Although we have planned for five days of activPAL wear (the recommendation is  
12 seven days), participants will wear these 24/7, and we will monitor data loss. External  
13 validity of the outcomes could be flawed, due to a recruitment process mainly  
14 benefiting highly-motivated persons at risk of stroke, and the risk of dropouts in less-  
15 motivated participants. Ethical dilemmas include that controls are not being  
16 supported in the same way as the intervention group and that the recruitment  
17 methods could be skewed and fail to reach out to vulnerable groups in society (lower  
18 SES) at risk for stroke. The strength of the study lies in the robustness of the RCT  
19 design, the process evaluation, and the interprofessional collaboration in a clinical  
20 PHC context. The data from the process evaluation will increase and ease the  
21 possibility of implementation of a prevention program for NCDs in PHC. The risk of  
22 contamination between control and intervention is deemed minimal, as participants  
23 are recruited via social media in a large city.  
24  
25  
26  
27  
28  
29  
30  
31  
32  
33  
34  
35  
36

### 37 **ETHICS AND DISSEMINATION**

38  
39 An approval from the Swedish Ethical Review Authority, Sweden has been granted  
40 (Ref. numbers. 2015/834-31, 2016/2203-32, 2019/01444 and 2021-05902-02). Data  
41 management will be complying with the general data protection regulation, GDPR,  
42 and all data will be stored securely to protect the confidentiality. Participation in the  
43 study is not expected to lead to health risks or complications, and potential health  
44 consequences will be monitored. Participant who experiences any health-related  
45 problems during the study will be guided to contact their GP. Participants may  
46 choose to interrupt their participation in the study at any time. Researchers can also  
47 discontinue a participant's participation based on health issues, or reasons that might  
48 jeopardise that person's safety. Reasons for interruption will be recorded.  
49  
50  
51  
52  
53  
54  
55  
56  
57  
58  
59  
60

1  
2  
3 The findings of the study will be published in peer-reviewed journals, and the results  
4 will be disseminated to participants, the public, PHC staff, and decision-makers  
5 through national and international conferences, as well as study-specific web pages.  
6  
7  
8

### 9 **AUTHOR CONTRIBUTIONS**

10  
11 AHP, EA, and SG conceived the original idea and outline of the study. AHP is  
12 implementing the protocol in primary healthcare settings, with regular dialog and  
13 review by CO, EÅ, GN, EA, and SG. CO, MH, GN, and EÅ contributed to the design  
14 of the study. AHP wrote the study protocol, together with EA and EJ. All authors  
15 discussed and commented on draft versions and approved the final version.  
16  
17  
18  
19

### 20 **FUNDING STATEMENT**

21  
22 This work was funded by grants from FORTE, grant number 2020-00175. This  
23 funding source had no role in the design of this study and will not have any role  
24 during its execution, analyses, interpretation of the data, or decision to submit results.  
25  
26  
27  
28  
29

### 30 **COMPETING INTERESTS**

31 The authors declare that they have no competing interests.  
32  
33  
34  
35  
36  
37  
38  
39  
40  
41  
42  
43  
44  
45  
46  
47  
48  
49  
50  
51  
52  
53  
54  
55  
56  
57  
58  
59  
60

## REFERENCES

1. Government S. Good quality, local health care—A primary care reform ). [http://www.sou.gov.se/wp-content/uploads/2018/06/Summary-SOU-2018.39\\_Final2.pdf](http://www.sou.gov.se/wp-content/uploads/2018/06/Summary-SOU-2018.39_Final2.pdf); 2018. Report No.: SOU 2018:39.
2. Assembly. UNG. Transforming our world: The 2030 Agenda for sustainable development. 2016 2022-11-30. Available from: <https://documents-dds-ny.un.org/doc/UNDOC/GEN/N15/291/89/PDF/N1529189.pdf?OpenElement>
3. Habner J. Preventing stroke: Uneven progress. A global policy research programme. 2017.
4. Goldstein LB, Bushnell CD, Adams RJ, Appel LJ, Braun LT, Chaturvedi S, et al. Guidelines for the primary prevention of stroke: a guideline for healthcare professionals from the American Heart Association/American Stroke Association. *Stroke*. 2011;42(2):517–84.
5. Béjot Y, Bailly H, Durier J, Giroud M. Epidemiology of stroke in Europe and trends for the 21st century. *La Presse Médicale*. 2016;45(12, Part 2):e391–e8.
6. Welfare TNBoHa. Statistics on Stroke 2020. 2021. Contract No.: Art no. 2021-12-7644.
7. Organization) WWH. The top 10 causes of death 2020 [Available from: <https://www.who.int/news-room/fact-sheets/detail/the-top-10-causes-of-death>.
8. Chiuve SE, Rexrode KM, Spiegelman D, Logroscino G, Manson JE, Rimm EB. Primary prevention of stroke by healthy lifestyle. *Circulation*. 2008;118(9):947–54.
9. Eakin EG, Glasgow RE, Riley KM. Review of primary care-based physical activity intervention studies: effectiveness and implications for practice and future research. *Database of Abstracts of Reviews of Effects (DARE): Quality-assessed Reviews [Internet]: Centre for Reviews and Dissemination (UK)*; 2000.
10. Weiss EC, Galuska DA, Khan LK, Gillespie C, Serdula MK. Weight regain in US adults who experienced substantial weight loss, 1999–2002. *American journal of preventive medicine*. 2007;33(1):34–40.
11. Hillsdon M, Thorogood M, White I, Foster C. Advising people to take more exercise is ineffective: a randomized controlled trial of physical activity promotion in primary care. *Int J Epidemiol*. 2002;31(4):808–15.
12. Sisti L, Dajko M, Campanella P, Shkurti E, Ricciardi W, De Waure C. The effect of multifactorial lifestyle interventions on cardiovascular risk factors: a systematic review and meta-analysis of trials conducted in the general population and high risk groups. *Preventive medicine*. 2018;109:82–97.
13. Lönnberg L, Ekblom-Bak E, Damberg M. Improved unhealthy lifestyle habits in patients with high cardiovascular risk: results from a structured lifestyle programme in primary care. *Upsala journal of medical sciences*. 2019;124(2):94–104.
14. Adibi S. *Mobile Health: A Technology Road Map*. Adibi S, editor: Springer; 2015.
15. Zonneveld M, Patomella A-H, Asaba E, Guidetti S. The use of information and communication technology in healthcare to improve participation in everyday life: a scoping review. *Disability and Rehabilitation*. 2019:1–8.
16. Chow CK, Ariyaratna N, Islam SM, Thiagalingam A, Redfern J. mHealth in Cardiovascular Health Care. *Heart Lung Circ*. 2016;25(8):802–7.
17. Owolabi MO, Thrift AG, Mahal A, Ishida M, Martins S, Johnson WD, et al. Primary stroke prevention worldwide: translating evidence into action. *The Lancet Public Health*. 2021.
18. Skivington K, Matthews L, Simpson SA, Craig P, Baird J, Blazeby JM, et al. Framework for the development and evaluation of complex interventions: gap analysis, workshop and consultation-informed update. 2021.



19. Jonsson H. A new direction in the conceptualization and categorization of occupation. *Journal of occupational science*. 2008;15(1):3–8.
20. Jonsson H, Josephsson S, Kielhofner G. Narratives and experience in an occupational transition: a longitudinal study of the retirement process. *Am J Occup Ther*. 2001;55(4):424–32.
21. Mälstam E, Asaba E, Åkesson E, Guidetti S, Patomella A-H. 'Weaving lifestyle habits': Complex pathways to health for persons at risk for stroke. *Scandinavian journal of occupational therapy*. 2021:1–13.
22. Asaba E, Bergström A, Patomella AH, Guidetti S. Engaging occupations among persons at risk for stroke: A health paradox. *Scandinavian journal of occupational therapy*. 2020:1–10.
23. Clark F, Azen SP, Zemke R, Jackson J, Carlson M, Mandel D, et al. Occupational therapy for independent-living older adults. A randomized controlled trial. *JAMA*. 1997;278(16):1321–6.
24. Clark F, Jackson J, Carlson M, Chou CP, Cherry BJ, Jordan-Marsh M, et al. Effectiveness of a lifestyle intervention in promoting the well-being of independently living older people: results of the Well Elderly 2 Randomised Controlled Trial. *J Epidemiol Community Health*. 2012;66(9):782–90.
25. Mountain G, Windle G, Hind D, Walters S, Keertharuth A, Chatters R, et al. A preventative lifestyle intervention for older adults (lifestyle matters): a randomised controlled trial. *Age Ageing*. 2017;46(4):627–34.
26. Moore GF, Audrey S, Barker M, Bond L, Bonell C, Hardeman W, et al. Process evaluation of complex interventions: Medical Research Council guidance. *BMJ*. 2015;350.
27. Patomella A-H, Farias L, Eriksson C, Guidetti S, Asaba E. Engagement in Everyday Activities for Prevention of Stroke: Feasibility of an mHealth-Supported Program for People with TIA. *Healthcare*. 2021;9(8):968.
28. Association NS. Stroke Risk Score Card 2018 [Available from: <https://www.stroke.org/stroke-risk-scorecard-2018/>].
29. Cup EH, op Reimer WS, Thijssen MC, van Kuyk-Minis M. Reliability and validity of the Canadian Occupational Performance Measure in stroke patients. *Clinical rehabilitation*. 2003;17(4):402.
30. Feigin V, Norrving B, Krishnamurthi R, Barker-Collo S, Wang W, Fu HUA, et al. Stroke Riskometer app: A new promising approach for primary stroke prevention and epidemiological research on stroke and other major non-communicable disorders (NCD) across the globe. *International Journal of Stroke*. 2015;10:101–2.
31. Medvedev O, Truong QC, Merkin A, Borotkanics R, Krishnamurthi R, Feigin V. Cross-cultural validation of the stroke riskometer using generalizability theory. *Scientific Reports*. 2021;11(1):1–10.
32. Law M, Baptiste S, McColl M, Opzoomer A, Polatajko H, Pollock N. The Canadian occupational performance measure: an outcome measure for occupational therapy. *Can J Occup Ther*. 1990;57(2):82–7.
33. Fugl-Meyer AR, Melin R, Fugl-Meyer KS. Life satisfaction in 18-to 64-year-old Swedes: in relation to gender, age, partner and immigrant status. *Journal of rehabilitation medicine*. 2002;34(5):239–46.
34. Burstrom K, Johannesson M, Diderichsen F. Swedish population health-related quality of life results using the EQ-5D. *Qual Life Res*. 2001;10(7):621-35.
35. Socialstyrelsen. Nationella riktlinjer för prevention och behandling vid ohälsosamma levnadsvanor. 2018.
36. Atler KE. User-perceived utility of the Daily Experiences of Pleasure, Productivity, and Restoration Profile. *Can J Occup Ther*. 2015;82(4):235–44.
37. Atler KE, Barney L, Moravec A, Sample PL, Fruhauf CA. The Daily Experiences of Pleasure, Productivity, and Restoration Profile: A case study: Etude de cas sur l'utilite du Daily Experiences of Pleasure, Productivity, and Restoration Profile. *Can J Occup Ther*. 2017;84(4-5):262–72.
38. Dearborn JL, McCullough LD. Perception of risk and knowledge of risk factors in women at high risk for stroke. *Stroke*. 2009;40(4):1181–6.



- 1
- 2
- 3 39. Prochaska JO, Redding CA, Evers KE. The transtheoretical model and stages of change.
- 4 Health behavior: Theory, research, and practice. 2015;125–48.
- 5 40. Aguilar-Farías N, Brown WJ, Peeters GG. ActiGraph GT3X+ cut-points for identifying
- 6 sedentary behaviour in older adults in free-living environments. Journal of science and medicine in
- 7 sport. 2014;17(3):293–9.
- 8 41. Boutron I, Moher D, Altman DG, Schulz KF, Ravaud P. Extending the CONSORT
- 9 statement to randomized trials of nonpharmacologic treatment: explanation and elaboration. Annals
- 10 of internal medicine. 2008;148(4):295–309.
- 11 42. Chan A-W, Tetzlaff JM, Altman DG, Laupacis A, Gøtzsche PC, Krleža-Jerić K, et al.
- 12 SPIRIT 2013 Statement: Defining standard protocol items for clinical trials. Ann Intern Med.
- 13 2013;158(3):200-207
- 14 43. Asaba E, Bergström A, Patomella A-H, Guidetti S. Engaging occupations among persons
- 15 at risk for stroke: a health paradox. Scandinavian journal of occupational therapy. 2020:1-10.
- 16 44. Dahlgren C, Dackehag M, Wändell P, Rehnberg C. Determinants for use of direct-to-
- 17 consumer telemedicine consultations in primary healthcare—a registry based total population study
- 18 from Stockholm, Sweden. BMC family practice. 2021;22(1):1–10.
- 19 45. Mouton A, Cloes M. Efficacy of a web-based, center-based or combined physical
- 20 activity intervention among older adults. Health Education Research. 2015;30(3):422–35.
- 21
- 22
- 23
- 24
- 25
- 26
- 27
- 28
- 29
- 30
- 31
- 32
- 33
- 34
- 35
- 36
- 37
- 38
- 39
- 40
- 41
- 42
- 43
- 44
- 45
- 46
- 47
- 48
- 49
- 50
- 51
- 52
- 53
- 54
- 55
- 56
- 57
- 58
- 59
- 60

Figure 1: An example of a checklist that shows the domains that the participants need to register in the app. Published with permission from ScientificMed Tech/Cuviva AB.

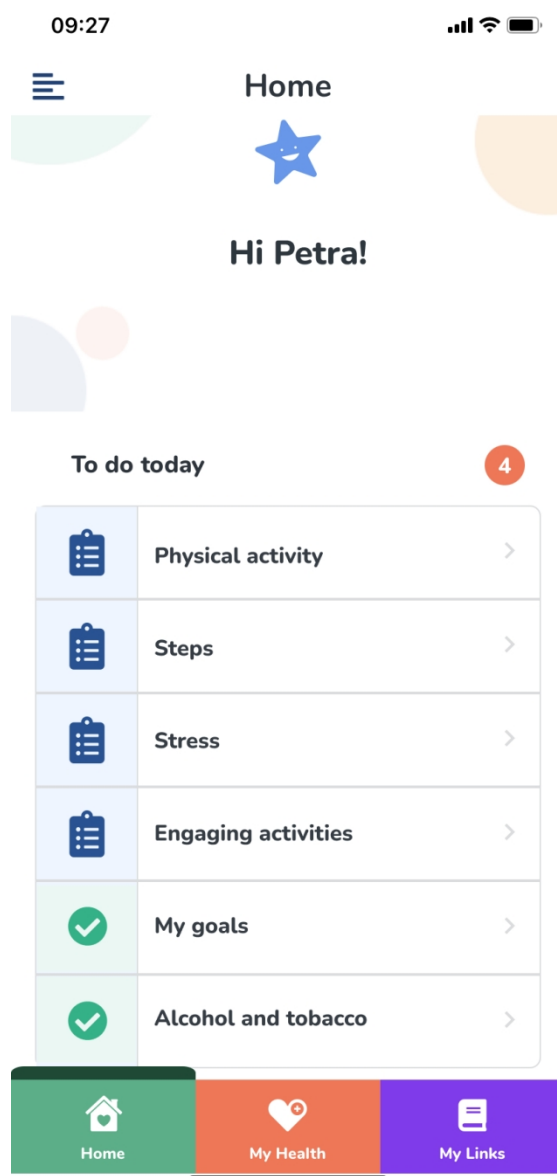

Figure 1: An example of a checklist that shows the domains that the participants need to register in the app. Published with permission from ScientificMed Tech/Cuviva AB.

751x1625mm (28 x 28 DPI)

# Reporting checklist for protocol of a clinical trial.

Based on the SPIRIT guidelines.

## Instructions to authors

Complete this checklist by entering the page numbers from your manuscript where readers will find each of the items listed below.

Your article may not currently address all the items on the checklist. Please modify your text to include the missing information. If you are certain that an item does not apply, please write "n/a" and provide a short explanation.

Upload your completed checklist as an extra file when you submit to a journal.

In your methods section, say that you used the SPIRIT reporting guidelines, and cite them as:

Chan A-W, Tetzlaff JM, Altman DG, Laupacis A, Gøtzsche PC, Krleža-Jerić K, Hróbjartsson A, Mann H, Dickersin K, Berlin J, Doré C, Parulekar W, Summerskill W, Groves T, Schulz K, Sox H, Rockhold FW, Rennie D, Moher D. SPIRIT 2013 Statement: Defining standard protocol items for clinical trials. *Ann Intern Med.* 2013;158(3):200-207

|                                   | Reporting Item                                                                                                                  | Page Number |
|-----------------------------------|---------------------------------------------------------------------------------------------------------------------------------|-------------|
| <b>Administrative information</b> |                                                                                                                                 |             |
| Title                             | <a href="#">#1</a> Descriptive title identifying the study design, population, interventions, and, if applicable, trial acronym | 1           |

|    |                     |                     |                                                    |                    |
|----|---------------------|---------------------|----------------------------------------------------|--------------------|
| 1  | Trial registration  | <a href="#">#2a</a> | Trial identifier and registry name. If not yet     | 2                  |
| 2  |                     |                     | registered, name of intended registry              |                    |
| 3  |                     |                     |                                                    |                    |
| 4  |                     |                     |                                                    |                    |
| 5  |                     |                     |                                                    |                    |
| 6  | Trial registration: | <a href="#">#2b</a> | All items from the World Health Organization       | N/A a registration |
| 7  | data set            |                     | Trial Registration Data Set                        | has not been       |
| 8  |                     |                     |                                                    | done               |
| 9  |                     |                     |                                                    |                    |
| 10 |                     |                     |                                                    |                    |
| 11 |                     |                     |                                                    |                    |
| 12 |                     |                     |                                                    |                    |
| 13 |                     |                     |                                                    |                    |
| 14 | Protocol version    | <a href="#">#3</a>  | Date and version identifier                        | 2                  |
| 15 |                     |                     |                                                    |                    |
| 16 |                     |                     |                                                    |                    |
| 17 | Funding             | <a href="#">#4</a>  | Sources and types of financial, material, and      | 20                 |
| 18 |                     |                     | other support                                      |                    |
| 19 |                     |                     |                                                    |                    |
| 20 |                     |                     |                                                    |                    |
| 21 |                     |                     |                                                    |                    |
| 22 |                     |                     |                                                    |                    |
| 23 | Roles and           | <a href="#">#5a</a> | Names, affiliations, and roles of protocol         | 20                 |
| 24 | responsibilities:   |                     | contributors                                       |                    |
| 25 |                     |                     |                                                    |                    |
| 26 | contributorship     |                     |                                                    |                    |
| 27 |                     |                     |                                                    |                    |
| 28 |                     |                     |                                                    |                    |
| 29 |                     |                     |                                                    |                    |
| 30 | Roles and           | <a href="#">#5b</a> | Name and contact information for the trial         | N/A, no trial      |
| 31 | responsibilities:   |                     | sponsor                                            | sponsor            |
| 32 |                     |                     |                                                    |                    |
| 33 | sponsor contact     |                     |                                                    |                    |
| 34 |                     |                     |                                                    |                    |
| 35 | information         |                     |                                                    |                    |
| 36 |                     |                     |                                                    |                    |
| 37 |                     |                     |                                                    |                    |
| 38 |                     |                     |                                                    |                    |
| 39 |                     |                     |                                                    |                    |
| 40 | Roles and           | <a href="#">#5c</a> | Role of study sponsor and funders, if any, in      | N/A                |
| 41 | responsibilities:   |                     | study design; collection, management, analysis,    |                    |
| 42 |                     |                     | and interpretation of data; writing of the report; |                    |
| 43 | sponsor and funder  |                     | and the decision to submit the report for          |                    |
| 44 |                     |                     | publication, including whether they will have      |                    |
| 45 |                     |                     | ultimate authority over any of these activities    |                    |
| 46 |                     |                     |                                                    |                    |
| 47 |                     |                     |                                                    |                    |
| 48 |                     |                     |                                                    |                    |
| 49 |                     |                     |                                                    |                    |
| 50 |                     |                     |                                                    |                    |
| 51 |                     |                     |                                                    |                    |
| 52 |                     |                     |                                                    |                    |
| 53 |                     |                     |                                                    |                    |
| 54 |                     |                     |                                                    |                    |
| 55 |                     |                     |                                                    |                    |
| 56 |                     |                     |                                                    |                    |
| 57 |                     |                     |                                                    |                    |
| 58 |                     |                     |                                                    |                    |
| 59 |                     |                     |                                                    |                    |
| 60 |                     |                     |                                                    |                    |

|    |                      |                     |                                                     |     |
|----|----------------------|---------------------|-----------------------------------------------------|-----|
| 1  | Roles and            | <a href="#">#5d</a> | Composition, roles, and responsibilities of the     | N/A |
| 2  |                      |                     |                                                     |     |
| 3  | responsibilities:    |                     | coordinating centre, steering committee, endpoint   |     |
| 4  |                      |                     |                                                     |     |
| 5  | committees           |                     | adjudication committee, data management team,       |     |
| 6  |                      |                     |                                                     |     |
| 7  |                      |                     | and other individuals or groups overseeing the      |     |
| 8  |                      |                     |                                                     |     |
| 9  |                      |                     | trial, if applicable (see Item 21a for data         |     |
| 10 |                      |                     |                                                     |     |
| 11 |                      |                     | monitoring committee)                               |     |
| 12 |                      |                     |                                                     |     |
| 13 |                      |                     |                                                     |     |
| 14 |                      |                     |                                                     |     |
| 15 | <b>Introduction</b>  |                     |                                                     |     |
| 16 |                      |                     |                                                     |     |
| 17 |                      |                     |                                                     |     |
| 18 | Background and       | <a href="#">#6a</a> | Description of research question and justification  | 7-9 |
| 19 |                      |                     |                                                     |     |
| 20 | rationale            |                     | for undertaking the trial, including summary of     |     |
| 21 |                      |                     |                                                     |     |
| 22 |                      |                     | relevant studies (published and unpublished)        |     |
| 23 |                      |                     |                                                     |     |
| 24 |                      |                     | examining benefits and harms for each               |     |
| 25 |                      |                     |                                                     |     |
| 26 |                      |                     | intervention                                        |     |
| 27 |                      |                     |                                                     |     |
| 28 |                      |                     |                                                     |     |
| 29 |                      |                     |                                                     |     |
| 30 |                      |                     |                                                     |     |
| 31 | Background and       | <a href="#">#6b</a> | Explanation for choice of comparators               | 8-9 |
| 32 |                      |                     |                                                     |     |
| 33 | rationale: choice of |                     |                                                     |     |
| 34 |                      |                     |                                                     |     |
| 35 | comparators          |                     |                                                     |     |
| 36 |                      |                     |                                                     |     |
| 37 |                      |                     |                                                     |     |
| 38 | Objectives           | <a href="#">#7</a>  | Specific objectives or hypotheses                   | 9   |
| 39 |                      |                     |                                                     |     |
| 40 |                      |                     |                                                     |     |
| 41 | Trial design         | <a href="#">#8</a>  | Description of trial design including type of trial | 9   |
| 42 |                      |                     |                                                     |     |
| 43 |                      |                     | (eg, parallel group, crossover, factorial, single   |     |
| 44 |                      |                     |                                                     |     |
| 45 |                      |                     | group), allocation ratio, and framework (eg,        |     |
| 46 |                      |                     |                                                     |     |
| 47 |                      |                     | superiority, equivalence, non-inferiority,          |     |
| 48 |                      |                     |                                                     |     |
| 49 |                      |                     | exploratory)                                        |     |
| 50 |                      |                     |                                                     |     |
| 51 |                      |                     |                                                     |     |
| 52 |                      |                     |                                                     |     |
| 53 |                      |                     |                                                     |     |

**Methods:****Participants,**

1 **interventions, and**  
 2  
 3 **outcomes**  
 4

|    |                      |                      |                                                             |
|----|----------------------|----------------------|-------------------------------------------------------------|
| 5  |                      |                      |                                                             |
| 6  | Study setting        | <a href="#">#9</a>   | Description of study settings (eg, community 9              |
| 7  |                      |                      | clinic, academic hospital) and list of countries            |
| 8  |                      |                      | where data will be collected. Reference to where            |
| 9  |                      |                      | list of study sites can be obtained                         |
| 10 |                      |                      |                                                             |
| 11 |                      |                      |                                                             |
| 12 |                      |                      |                                                             |
| 13 |                      |                      |                                                             |
| 14 |                      |                      |                                                             |
| 15 |                      |                      |                                                             |
| 16 | Eligibility criteria | <a href="#">#10</a>  | Inclusion and exclusion criteria for participants. If 10-11 |
| 17 |                      |                      | applicable, eligibility criteria for study centres and      |
| 18 |                      |                      | individuals who will perform the interventions (eg,         |
| 19 |                      |                      | surgeons, psychotherapists)                                 |
| 20 |                      |                      |                                                             |
| 21 |                      |                      |                                                             |
| 22 |                      |                      |                                                             |
| 23 |                      |                      |                                                             |
| 24 |                      |                      |                                                             |
| 25 |                      |                      |                                                             |
| 26 | Interventions:       | <a href="#">#11a</a> | Interventions for each group with sufficient detail 11-12   |
| 27 |                      |                      |                                                             |
| 28 | description          |                      | to allow replication, including how and when they           |
| 29 |                      |                      | will be administered                                        |
| 30 |                      |                      |                                                             |
| 31 |                      |                      |                                                             |
| 32 |                      |                      |                                                             |
| 33 |                      |                      |                                                             |
| 34 | Interventions:       | <a href="#">#11b</a> | Criteria for discontinuing or modifying allocated N/A       |
| 35 |                      |                      |                                                             |
| 36 | modifications        |                      | interventions for a given trial participant (eg, drug       |
| 37 |                      |                      | dose change in response to harms, participant               |
| 38 |                      |                      | request, or improving / worsening disease)                  |
| 39 |                      |                      |                                                             |
| 40 |                      |                      |                                                             |
| 41 |                      |                      |                                                             |
| 42 |                      |                      |                                                             |
| 43 | Interventions:       | <a href="#">#11c</a> | Strategies to improve adherence to intervention N/A         |
| 44 |                      |                      |                                                             |
| 45 | adherence            |                      | protocols, and any procedures for monitoring                |
| 46 |                      |                      | adherence (eg, drug tablet return; laboratory               |
| 47 |                      |                      | tests)                                                      |
| 48 |                      |                      |                                                             |
| 49 |                      |                      |                                                             |
| 50 |                      |                      |                                                             |
| 51 |                      |                      |                                                             |
| 52 |                      |                      |                                                             |
| 53 | Interventions:       | <a href="#">#11d</a> | Relevant concomitant care and interventions that N/A        |
| 54 |                      |                      |                                                             |
| 55 | concomitant care     |                      | are permitted or prohibited during the trial                |
| 56 |                      |                      |                                                             |
| 57 |                      |                      |                                                             |
| 58 |                      |                      |                                                             |
| 59 |                      |                      |                                                             |
| 60 |                      |                      |                                                             |

|    |                      |                     |                                                    |       |
|----|----------------------|---------------------|----------------------------------------------------|-------|
| 1  | Outcomes             | <a href="#">#12</a> | Primary, secondary, and other outcomes,            | 13-14 |
| 2  |                      |                     |                                                    |       |
| 3  |                      |                     |                                                    |       |
| 4  |                      |                     | including the specific measurement variable (eg,   |       |
| 5  |                      |                     |                                                    |       |
| 6  |                      |                     | systolic blood pressure), analysis metric (eg,     |       |
| 7  |                      |                     |                                                    |       |
| 8  |                      |                     | change from baseline, final value, time to event), |       |
| 9  |                      |                     |                                                    |       |
| 10 |                      |                     |                                                    |       |
| 11 |                      |                     | method of aggregation (eg, median, proportion),    |       |
| 12 |                      |                     |                                                    |       |
| 13 |                      |                     | and time point for each outcome. Explanation of    |       |
| 14 |                      |                     |                                                    |       |
| 15 |                      |                     | the clinical relevance of chosen efficacy and      |       |
| 16 |                      |                     |                                                    |       |
| 17 |                      |                     | harm outcomes is strongly recommended              |       |
| 18 |                      |                     |                                                    |       |
| 19 |                      |                     |                                                    |       |
| 20 | Participant timeline | <a href="#">#13</a> | Time schedule of enrolment, interventions          | 15    |
| 21 |                      |                     |                                                    |       |
| 22 |                      |                     | (including any run-ins and washouts),              |       |
| 23 |                      |                     |                                                    |       |
| 24 |                      |                     | assessments, and visits for participants. A        |       |
| 25 |                      |                     |                                                    |       |
| 26 |                      |                     |                                                    |       |
| 27 |                      |                     | schematic diagram is highly recommended (see       |       |
| 28 |                      |                     |                                                    |       |
| 29 |                      |                     | Figure)                                            |       |
| 30 |                      |                     |                                                    |       |
| 31 |                      |                     |                                                    |       |
| 32 | Sample size          | <a href="#">#14</a> | Estimated number of participants needed to         | 10    |
| 33 |                      |                     |                                                    |       |
| 34 |                      |                     | achieve study objectives and how it was            |       |
| 35 |                      |                     |                                                    |       |
| 36 |                      |                     | determined, including clinical and statistical     |       |
| 37 |                      |                     |                                                    |       |
| 38 |                      |                     | assumptions supporting any sample size             |       |
| 39 |                      |                     |                                                    |       |
| 40 |                      |                     | calculations                                       |       |
| 41 |                      |                     |                                                    |       |
| 42 |                      |                     |                                                    |       |
| 43 |                      |                     |                                                    |       |
| 44 | Recruitment          | <a href="#">#15</a> | Strategies for achieving adequate participant      | 10    |
| 45 |                      |                     |                                                    |       |
| 46 |                      |                     | enrolment to reach target sample size              |       |
| 47 |                      |                     |                                                    |       |
| 48 |                      |                     |                                                    |       |
| 49 |                      |                     |                                                    |       |

## Methods:

### Assignment of interventions (for controlled trials)

|    |                     |                      |                                                       |              |
|----|---------------------|----------------------|-------------------------------------------------------|--------------|
| 1  | Allocation:         | <a href="#">#16a</a> | Method of generating the allocation sequence          | 10-11        |
| 2  |                     |                      |                                                       |              |
| 3  | sequence            |                      | (eg, computer-generated random numbers), and          |              |
| 4  |                     |                      |                                                       |              |
| 5  | generation          |                      | list of any factors for stratification. To reduce     |              |
| 6  |                     |                      |                                                       |              |
| 7  |                     |                      |                                                       |              |
| 8  |                     |                      |                                                       |              |
| 9  |                     |                      |                                                       |              |
| 10 |                     |                      |                                                       |              |
| 11 |                     |                      |                                                       |              |
| 12 |                     |                      |                                                       |              |
| 13 |                     |                      |                                                       |              |
| 14 |                     |                      |                                                       |              |
| 15 |                     |                      |                                                       |              |
| 16 |                     |                      |                                                       |              |
| 17 |                     |                      |                                                       |              |
| 18 |                     |                      |                                                       |              |
| 19 |                     |                      |                                                       |              |
| 20 | Allocation          | <a href="#">#16b</a> | Mechanism of implementing the allocation              | 11           |
| 21 |                     |                      |                                                       |              |
| 22 | concealment         |                      | sequence (eg, central telephone; sequentially         |              |
| 23 |                     |                      |                                                       |              |
| 24 | mechanism           |                      | numbered, opaque, sealed envelopes),                  |              |
| 25 |                     |                      |                                                       |              |
| 26 |                     |                      |                                                       |              |
| 27 |                     |                      |                                                       |              |
| 28 |                     |                      |                                                       |              |
| 29 |                     |                      |                                                       |              |
| 30 |                     |                      |                                                       |              |
| 31 |                     |                      |                                                       |              |
| 32 | Allocation:         | <a href="#">#16c</a> | Who will generate the allocation sequence, who        | N/A not been |
| 33 |                     |                      |                                                       |              |
| 34 | implementation      |                      | will enrol participants, and who will assign          | decided      |
| 35 |                     |                      |                                                       |              |
| 36 |                     |                      |                                                       |              |
| 37 |                     |                      |                                                       |              |
| 38 |                     |                      |                                                       |              |
| 39 |                     |                      |                                                       |              |
| 40 | Blinding (masking)  | <a href="#">#17a</a> | Who will be blinded after assignment to               | 10           |
| 41 |                     |                      |                                                       |              |
| 42 |                     |                      |                                                       |              |
| 43 |                     |                      |                                                       |              |
| 44 |                     |                      |                                                       |              |
| 45 |                     |                      |                                                       |              |
| 46 |                     |                      |                                                       |              |
| 47 |                     |                      |                                                       |              |
| 48 |                     |                      |                                                       |              |
| 49 |                     |                      |                                                       |              |
| 50 | Blinding (masking): | <a href="#">#17b</a> | If blinded, circumstances under which unblinding      | N/A          |
| 51 |                     |                      |                                                       |              |
| 52 | emergency           |                      | is permissible, and procedure for revealing a         |              |
| 53 |                     |                      |                                                       |              |
| 54 | unblinding          |                      | participant's allocated intervention during the trial |              |
| 55 |                     |                      |                                                       |              |
| 56 |                     |                      |                                                       |              |
| 57 |                     |                      |                                                       |              |
| 58 |                     |                      |                                                       |              |
| 59 |                     |                      |                                                       |              |
| 60 |                     |                      |                                                       |              |



1 **Methods: Data**  
 2  
 3 **collection,**  
 4  
 5 **management, and**  
 6  
 7 **analysis**  
 8  
 9

|    |                      |                      |                                                           |
|----|----------------------|----------------------|-----------------------------------------------------------|
| 10 |                      |                      |                                                           |
| 11 | Data collection plan | <a href="#">#18a</a> | Plans for assessment and collection of outcome, 13-15     |
| 12 |                      |                      |                                                           |
| 13 |                      |                      | baseline, and other trial data, including any             |
| 14 |                      |                      |                                                           |
| 15 |                      |                      | related processes to promote data quality (eg,            |
| 16 |                      |                      | duplicate 6measurements, training of assessors)           |
| 17 |                      |                      |                                                           |
| 18 |                      |                      | and a description of study instruments (eg,               |
| 19 |                      |                      |                                                           |
| 20 |                      |                      | questionnaires, laboratory tests) along with their        |
| 21 |                      |                      |                                                           |
| 22 |                      |                      | reliability and validity, if known. Reference to          |
| 23 |                      |                      |                                                           |
| 24 |                      |                      | where data collection forms can be found, if not          |
| 25 |                      |                      |                                                           |
| 26 |                      |                      | in the protocol                                           |
| 27 |                      |                      |                                                           |
| 28 |                      |                      |                                                           |
| 29 |                      |                      |                                                           |
| 30 |                      |                      |                                                           |
| 31 |                      |                      |                                                           |
| 32 | Data collection      | <a href="#">#18b</a> | Plans to promote participant retention and N/A not been   |
| 33 |                      |                      |                                                           |
| 34 | plan: retention      |                      | complete follow-up, including list of any outcome decided |
| 35 |                      |                      |                                                           |
| 36 |                      |                      | data to be collected for participants who                 |
| 37 |                      |                      |                                                           |
| 38 |                      |                      | discontinue or deviate from intervention protocols        |
| 39 |                      |                      |                                                           |
| 40 |                      |                      |                                                           |
| 41 |                      |                      |                                                           |
| 42 | Data management      | <a href="#">#19</a>  | Plans for data entry, coding, security, and 15            |
| 43 |                      |                      |                                                           |
| 44 |                      |                      | storage, including any related processes to               |
| 45 |                      |                      |                                                           |
| 46 |                      |                      | promote data quality (eg, double data entry;              |
| 47 |                      |                      |                                                           |
| 48 |                      |                      | range checks for data values). Reference to               |
| 49 |                      |                      |                                                           |
| 50 |                      |                      | where details of data management procedures               |
| 51 |                      |                      |                                                           |
| 52 |                      |                      | can be found, if not in the protocol                      |
| 53 |                      |                      |                                                           |
| 54 |                      |                      |                                                           |
| 55 |                      |                      |                                                           |
| 56 |                      |                      |                                                           |
| 57 |                      |                      |                                                           |
| 58 |                      |                      |                                                           |
| 59 |                      |                      |                                                           |
| 60 |                      |                      |                                                           |

|    |                        |                      |                                                   |             |
|----|------------------------|----------------------|---------------------------------------------------|-------------|
| 1  | Statistics: outcomes   | <a href="#">#20a</a> | Statistical methods for analysing primary and     | 17-18       |
| 2  |                        |                      |                                                   |             |
| 3  |                        |                      | secondary outcomes. Reference to where other      |             |
| 4  |                        |                      | details of the statistical analysis plan can be   |             |
| 5  |                        |                      | found, if not in the protocol                     |             |
| 6  |                        |                      |                                                   |             |
| 7  |                        |                      |                                                   |             |
| 8  |                        |                      |                                                   |             |
| 9  |                        |                      |                                                   |             |
| 10 |                        |                      |                                                   |             |
| 11 | Statistics: additional | <a href="#">#20b</a> | Methods for any additional analyses (eg,          | N/A         |
| 12 | analyses               |                      | subgroup and adjusted analyses)                   |             |
| 13 |                        |                      |                                                   |             |
| 14 |                        |                      |                                                   |             |
| 15 |                        |                      |                                                   |             |
| 16 | Statistics: analysis   | <a href="#">#20c</a> | Definition of analysis population relating to     | Not decided |
| 17 | population and         |                      | protocol non-adherence (eg, as randomised         |             |
| 18 | missing data           |                      | analysis), and any statistical methods to handle  |             |
| 19 |                        |                      | missing data (eg, multiple imputation)            |             |
| 20 |                        |                      |                                                   |             |
| 21 |                        |                      |                                                   |             |
| 22 |                        |                      |                                                   |             |
| 23 |                        |                      |                                                   |             |
| 24 |                        |                      |                                                   |             |
| 25 |                        |                      |                                                   |             |
| 26 | <b>Methods:</b>        |                      |                                                   |             |
| 27 |                        |                      |                                                   |             |
| 28 | <b>Monitoring</b>      |                      |                                                   |             |
| 29 |                        |                      |                                                   |             |
| 30 |                        |                      |                                                   |             |
| 31 | Data monitoring:       | <a href="#">#21a</a> | Composition of data monitoring committee          | N/A         |
| 32 | formal committee       |                      | (DMC); summary of its role and reporting          |             |
| 33 |                        |                      | structure; statement of whether it is independent |             |
| 34 |                        |                      | from the sponsor and competing interests; and     |             |
| 35 |                        |                      | reference to where further details about its      |             |
| 36 |                        |                      | charter can be found, if not in the protocol.     |             |
| 37 |                        |                      | Alternatively, an explanation of why a DMC is not |             |
| 38 |                        |                      | needed                                            |             |
| 39 |                        |                      |                                                   |             |
| 40 |                        |                      |                                                   |             |
| 41 |                        |                      |                                                   |             |
| 42 |                        |                      |                                                   |             |
| 43 |                        |                      |                                                   |             |
| 44 |                        |                      |                                                   |             |
| 45 |                        |                      |                                                   |             |
| 46 |                        |                      |                                                   |             |
| 47 |                        |                      |                                                   |             |
| 48 |                        |                      |                                                   |             |
| 49 |                        |                      |                                                   |             |
| 50 | Data monitoring:       | <a href="#">#21b</a> | Description of any interim analyses and stopping  | N/A         |
| 51 | interim analysis       |                      | guidelines, including who will have access to     |             |
| 52 |                        |                      | these interim results and make the final decision |             |
| 53 |                        |                      | to terminate the trial                            |             |
| 54 |                        |                      |                                                   |             |
| 55 |                        |                      |                                                   |             |
| 56 |                        |                      |                                                   |             |
| 57 |                        |                      |                                                   |             |
| 58 |                        |                      |                                                   |             |
| 59 |                        |                      |                                                   |             |
| 60 |                        |                      |                                                   |             |

|    |                                      |                      |                                                      |     |
|----|--------------------------------------|----------------------|------------------------------------------------------|-----|
| 1  | Harms                                | <a href="#">#22</a>  | Plans for collecting, assessing, reporting, and      | N/A |
| 2  |                                      |                      | managing solicited and spontaneously reported        |     |
| 3  |                                      |                      | adverse events and other unintended effects of       |     |
| 4  |                                      |                      | trial interventions or trial conduct                 |     |
| 5  |                                      |                      |                                                      |     |
| 6  |                                      |                      |                                                      |     |
| 7  |                                      |                      |                                                      |     |
| 8  |                                      |                      |                                                      |     |
| 9  |                                      |                      |                                                      |     |
| 10 | Auditing                             | <a href="#">#23</a>  | Frequency and procedures for auditing trial          | N/A |
| 11 |                                      |                      | conduct, if any, and whether the process will be     |     |
| 12 |                                      |                      | independent from investigators and the sponsor       |     |
| 13 |                                      |                      |                                                      |     |
| 14 |                                      |                      |                                                      |     |
| 15 |                                      |                      |                                                      |     |
| 16 |                                      |                      |                                                      |     |
| 17 |                                      |                      |                                                      |     |
| 18 |                                      |                      |                                                      |     |
| 19 | <b>Ethics and</b>                    |                      |                                                      |     |
| 20 |                                      |                      |                                                      |     |
| 21 | <b>dissemination</b>                 |                      |                                                      |     |
| 22 |                                      |                      |                                                      |     |
| 23 |                                      |                      |                                                      |     |
| 24 | Research ethics approval             | <a href="#">#24</a>  | Plans for seeking research ethics committee /        | 19  |
| 25 |                                      |                      | institutional review board (REC / IRB) approval      |     |
| 26 |                                      |                      |                                                      |     |
| 27 |                                      |                      |                                                      |     |
| 28 |                                      |                      |                                                      |     |
| 29 | Protocol amendments                  | <a href="#">#25</a>  | Plans for communicating important protocol           | N/A |
| 30 |                                      |                      | modifications (eg, changes to eligibility criteria,  |     |
| 31 |                                      |                      | outcomes, analyses) to relevant parties (eg,         |     |
| 32 |                                      |                      | investigators, REC / IRBs, trial participants, trial |     |
| 33 |                                      |                      | registries, journals, regulators)                    |     |
| 34 |                                      |                      |                                                      |     |
| 35 |                                      |                      |                                                      |     |
| 36 |                                      |                      |                                                      |     |
| 37 |                                      |                      |                                                      |     |
| 38 |                                      |                      |                                                      |     |
| 39 |                                      |                      |                                                      |     |
| 40 |                                      |                      |                                                      |     |
| 41 | Consent or assent                    | <a href="#">#26a</a> | Who will obtain informed consent or assent from      | 11  |
| 42 |                                      |                      | potential trial participants or authorised           |     |
| 43 |                                      |                      | surrogates, and how (see Item 32)                    |     |
| 44 |                                      |                      |                                                      |     |
| 45 |                                      |                      |                                                      |     |
| 46 |                                      |                      |                                                      |     |
| 47 |                                      |                      |                                                      |     |
| 48 |                                      |                      |                                                      |     |
| 49 | Consent or assent: ancillary studies | <a href="#">#26b</a> | Additional consent provisions for collection and     | N/A |
| 50 |                                      |                      | use of participant data and biological specimens     |     |
| 51 |                                      |                      | in ancillary studies, if applicable                  |     |
| 52 |                                      |                      |                                                      |     |
| 53 |                                      |                      |                                                      |     |
| 54 |                                      |                      |                                                      |     |
| 55 |                                      |                      |                                                      |     |
| 56 |                                      |                      |                                                      |     |
| 57 |                                      |                      |                                                      |     |
| 58 |                                      |                      |                                                      |     |
| 59 |                                      |                      |                                                      |     |
| 60 |                                      |                      |                                                      |     |

|    |                       |                      |                                                        |                 |
|----|-----------------------|----------------------|--------------------------------------------------------|-----------------|
| 1  | Confidentiality       | <a href="#">#27</a>  | How personal information about potential and           | 19              |
| 2  |                       |                      | enrolled participants will be collected, shared,       |                 |
| 3  |                       |                      | and maintained in order to protect confidentiality     |                 |
| 4  |                       |                      | before, during, and after the trial                    |                 |
| 5  |                       |                      |                                                        |                 |
| 6  |                       |                      |                                                        |                 |
| 7  |                       |                      |                                                        |                 |
| 8  |                       |                      |                                                        |                 |
| 9  |                       |                      |                                                        |                 |
| 10 |                       |                      |                                                        |                 |
| 11 | Declaration of        | <a href="#">#28</a>  | Financial and other competing interests for            | 20              |
| 12 | interests             |                      | principal investigators for the overall trial and      |                 |
| 13 |                       |                      | each study site                                        |                 |
| 14 |                       |                      |                                                        |                 |
| 15 |                       |                      |                                                        |                 |
| 16 |                       |                      |                                                        |                 |
| 17 |                       |                      |                                                        |                 |
| 18 |                       |                      |                                                        |                 |
| 19 | Data access           | <a href="#">#29</a>  | Statement of who will have access to the final         | 19, has been    |
| 20 |                       |                      | trial dataset, and disclosure of contractual           | informed to the |
| 21 |                       |                      | agreements that limit such access for                  | ethics review   |
| 22 |                       |                      | investigators                                          | board           |
| 23 |                       |                      |                                                        |                 |
| 24 |                       |                      |                                                        |                 |
| 25 |                       |                      |                                                        |                 |
| 26 |                       |                      |                                                        |                 |
| 27 |                       |                      |                                                        |                 |
| 28 |                       |                      |                                                        |                 |
| 29 | Ancillary and post    | <a href="#">#30</a>  | Provisions, if any, for ancillary and post-trial care, | None            |
| 30 | trial care            |                      | and for compensation to those who suffer harm          |                 |
| 31 |                       |                      | from trial participation                               |                 |
| 32 |                       |                      |                                                        |                 |
| 33 |                       |                      |                                                        |                 |
| 34 |                       |                      |                                                        |                 |
| 35 |                       |                      |                                                        |                 |
| 36 | Dissemination         | <a href="#">#31a</a> | Plans for investigators and sponsor to                 | 20              |
| 37 | policy: trial results |                      | communicate trial results to participants,             |                 |
| 38 |                       |                      | healthcare professionals, the public, and other        |                 |
| 39 |                       |                      | relevant groups (eg, via publication, reporting in     |                 |
| 40 |                       |                      | results databases, or other data sharing               |                 |
| 41 |                       |                      | arrangements), including any publication               |                 |
| 42 |                       |                      | restrictions                                           |                 |
| 43 |                       |                      |                                                        |                 |
| 44 |                       |                      |                                                        |                 |
| 45 |                       |                      |                                                        |                 |
| 46 |                       |                      |                                                        |                 |
| 47 |                       |                      |                                                        |                 |
| 48 |                       |                      |                                                        |                 |
| 49 |                       |                      |                                                        |                 |
| 50 |                       |                      |                                                        |                 |
| 51 |                       |                      |                                                        |                 |
| 52 |                       |                      |                                                        |                 |
| 53 | Dissemination         | <a href="#">#31b</a> | Authorship eligibility guidelines and any intended     | 20              |
| 54 | policy: authorship    |                      | use of professional writers                            |                 |
| 55 |                       |                      |                                                        |                 |
| 56 |                       |                      |                                                        |                 |
| 57 |                       |                      |                                                        |                 |
| 58 |                       |                      |                                                        |                 |
| 59 |                       |                      |                                                        |                 |
| 60 |                       |                      |                                                        |                 |

1 Dissemination [#31c](#) Plans, if any, for granting public access to the full None  
 2  
 3 policy: reproducible protocol, participant-level dataset, and statistical  
 4  
 5 research code  
 6  
 7

## 8 Appendices

9  
 10  
 11  
 12 Informed consent [#32](#) Model consent form and other related N/A the study was  
 13  
 14 materials documentation given to participants and granted including  
 15  
 16 authorised surrogates consent forms, by  
 17  
 18 national review  
 19  
 20 board  
 21  
 22  
 23

24 Biological [#33](#) Plans for collection, laboratory evaluation, and N/A  
 25  
 26 specimens storage of biological specimens for genetic or  
 27  
 28 molecular analysis in the current trial and for  
 29  
 30 future use in ancillary studies, if applicable  
 31  
 32  
 33

34 None The SPIRIT checklist is distributed under the terms of the Creative Commons Attribution

35 License CC-BY-ND 3.0. This checklist can be completed online using <https://www.goodreports.org/>, a  
 36  
 37 tool made by the [EQUATOR Network](#) in collaboration with [Penelope.ai](#)  
 38  
 39  
 40  
 41  
 42  
 43  
 44  
 45  
 46  
 47  
 48  
 49  
 50  
 51  
 52  
 53  
 54  
 55  
 56  
 57  
 58  
 59  
 60

# BMJ Open

## Make My Day: Primary prevention of stroke using engaging everyday activities as a mediator of sustainable health—a randomised controlled trial and process evaluation protocol

|                                 |                                                                                                                                                                                                                                                                                                                                                                                                                                                                                                                                                                                                                                                                                                                                                                                                                                                                                                                                                                                                                                                  |
|---------------------------------|--------------------------------------------------------------------------------------------------------------------------------------------------------------------------------------------------------------------------------------------------------------------------------------------------------------------------------------------------------------------------------------------------------------------------------------------------------------------------------------------------------------------------------------------------------------------------------------------------------------------------------------------------------------------------------------------------------------------------------------------------------------------------------------------------------------------------------------------------------------------------------------------------------------------------------------------------------------------------------------------------------------------------------------------------|
| Journal:                        | <i>BMJ Open</i>                                                                                                                                                                                                                                                                                                                                                                                                                                                                                                                                                                                                                                                                                                                                                                                                                                                                                                                                                                                                                                  |
| Manuscript ID                   | bmjopen-2023-072037.R1                                                                                                                                                                                                                                                                                                                                                                                                                                                                                                                                                                                                                                                                                                                                                                                                                                                                                                                                                                                                                           |
| Article Type:                   | Protocol                                                                                                                                                                                                                                                                                                                                                                                                                                                                                                                                                                                                                                                                                                                                                                                                                                                                                                                                                                                                                                         |
| Date Submitted by the Author:   | 04-Jul-2023                                                                                                                                                                                                                                                                                                                                                                                                                                                                                                                                                                                                                                                                                                                                                                                                                                                                                                                                                                                                                                      |
| Complete List of Authors:       | Patomella, Ann-Helen; Karolinska Institutet, Department of Neurobiology, Care Sciences and Society; Academic Primary Health Care Centre<br>Guidetti, Susanne; Karolinska Institutet, Department of Neurobiology, Care Sciences and Society; Karolinska University Hospital<br>Hagströmer, Maria; Karolinska Institute, Department of Neurobiology Care Sciences and society; Academic Primary Health Care Centre<br>Olsson, Christina; Academic Primary Health Care Centre, ; Karolinska Institutet, Department of Neurobiology, Care Sciences and Society<br>Jakobsson, E; Karolinska Institutet, Department of Neurobiology, Care Sciences and Society<br>Nilsson, Gunnar; Academic Primary Health Care Centre; Karolinska Institutet, Department of Neurobiology, Care Sciences and Society<br>Åkesson, Elisabet; Karolinska Institutet, Department of Neurobiology, Care Sciences and Society; Stockholms Sjukhem FoUU<br>Asaba, Eric; Karolinska Institutet, Department of Neurobiology, Care Sciences and Society; Stockholms Sjukhem FoUU |
| <b>Primary Subject Heading</b>: | Health services research                                                                                                                                                                                                                                                                                                                                                                                                                                                                                                                                                                                                                                                                                                                                                                                                                                                                                                                                                                                                                         |
| Secondary Subject Heading:      | Cardiovascular medicine, Neurology, Rehabilitation medicine                                                                                                                                                                                                                                                                                                                                                                                                                                                                                                                                                                                                                                                                                                                                                                                                                                                                                                                                                                                      |
| Keywords:                       | Stroke < NEUROLOGY, PREVENTIVE MEDICINE, REHABILITATION MEDICINE                                                                                                                                                                                                                                                                                                                                                                                                                                                                                                                                                                                                                                                                                                                                                                                                                                                                                                                                                                                 |
|                                 |                                                                                                                                                                                                                                                                                                                                                                                                                                                                                                                                                                                                                                                                                                                                                                                                                                                                                                                                                                                                                                                  |

SCHOLARONE™  
Manuscripts

1  
2  
3  
4 **Make My Day: Primary prevention of stroke using engaging everyday activities as a**  
5 **mediator of sustainable health—a randomised controlled trial and process evaluation**  
6 **protocol**  
7  
8  
9

10 Patomella Ann-Helen, [ann-helen.patomella@ki.se](mailto:ann-helen.patomella@ki.se), (ORCID 0000-0003-2667-4073)<sup>1</sup>,

11  
12 2

13  
14 Guidetti Susanne, [Susanne.guidetti@ki.se](mailto:Susanne.guidetti@ki.se), (ORCID 0000-0001-6878-6394)<sup>1,3</sup>

15  
16 Hagströmer Maria, [maria.hagstromer@ki.se](mailto:maria.hagstromer@ki.se), (ORCID 0000-0002-4607-8677)<sup>1, 2</sup>

17  
18 Olsson Christina B, [christina.b.olsson@regionstockholm.se](mailto:christina.b.olsson@regionstockholm.se), (0000-0003-1300-7765)

19  
20 2,4

21  
22 Jakobsson Elin, [elin.jakobsson@ki.se](mailto:elin.jakobsson@ki.se), (ORCID 0000-0001-9756-1354)<sup>1</sup>

23  
24 Nilsson Gunnar, [gunnar.nilsson@ki.se](mailto:gunnar.nilsson@ki.se), (ORCID 0000-0001-7811-7602)<sup>2,5</sup>

25  
26 Åkesson Elisabet, [elisabet.akesson@ki.se](mailto:elisabet.akesson@ki.se), (ORCID 0000-0002-8227-9118)<sup>6,7</sup>

27  
28 Asaba Eric, [eric.asaba@ki.se](mailto:eric.asaba@ki.se), (ORCID 0000-0002-6910-3468)<sup>1,7</sup>

29  
30 Affiliation:

31  
32 <sup>1</sup>Department of Neurobiology, Care Sciences and Society, Division of Occupational  
33 Therapy, Karolinska Institutet, Stockholm, Sweden

34  
35 <sup>2</sup> Academic Primary Health Care Centre, Region Stockholm, Stockholm, Sweden

36  
37 <sup>3</sup> Women's Health and Allied Health Professionals Theme, Medical Unit Occupational  
38 therapy and Physiotherapy, Karolinska University Hospital

39  
40 <sup>4</sup> Department of Neurobiology, Care Sciences and Society, Division of Physiotherapy,  
41 Karolinska Institutet, Stockholm, Sweden

42  
43 <sup>5</sup> Department of Neurobiology, Care Sciences and Society, Division of Family  
44 Medicine and Primary Care, Karolinska Institutet, Stockholm, Sweden

45  
46 <sup>6</sup> Department of Neurobiology, Care Sciences and Society, Division of  
47 Neurogeriatrics, Karolinska Institutet, Stockholm, Sweden

48  
49 <sup>7</sup> R&D Unit, Stockholms Sjukhem, Stockholm, Sweden  
50  
51  
52  
53  
54  
55  
56  
57  
58  
59  
60

**Corresponding author:**

Ann-Helen Patomella, Department of Neurobiology, Care Sciences and Society, Division of Occupational Therapy, Karolinska Institutet, Stockholm, Sweden

Email address: ann-helen.patomella@ki.se

Phone number: +46 852483726

\* I, the Submitting Author has the right to grant and does grant on behalf of all authors of the Work (as defined in the below author licence), an exclusive licence and/or a non-exclusive licence for contributions from authors who are: i) UK Crown employees; ii) where BMJ has agreed a CC-BY licence shall apply, and/or iii) in accordance with the terms applicable for US Federal Government officers or employees acting as part of their official duties; on a worldwide, perpetual, irrevocable, royalty-free basis to BMJ Publishing Group Ltd ("BMJ") its licensees and where the relevant Journal is co-owned by BMJ to the co-owners of the Journal, to publish the Work in BMJ Open and any other BMJ products and to exploit all rights, as set out in our licence.

The Submitting Author accepts and understands that any supply made under these terms is made by BMJ to the Submitting Author unless you are acting as an employee on behalf of your employer or a postgraduate student of an affiliated institution which is paying any applicable article publishing charge ("APC") for Open Access articles. Where the Submitting Author wishes to make the Work available on an Open Access basis (and intends to pay the relevant APC), the terms of reuse of such Open Access shall be governed by a Creative Commons licence – details of these licences and which Creative Commons licence will apply to this Work are set out in our licence referred to above.

**Word count:** 3317

**Protocol version:** 29<sup>th</sup> of June 2023. Version 2.0

**Trial Registration number:** ClinicalTrials.gov Identifier: NCT05279508



## **Abstract**

### Introduction

The individual, societal and economic benefits of stroke prevention are high. Even though most risk factors can be reduced by changes to lifestyle habits, maintaining new and healthy activity patterns has been shown to be challenging.

The aim of the study is to evaluate the impact of an interdisciplinary team-based, mHealth-supported prevention intervention on persons at risk for stroke. The intervention is mediated by engaging everyday activities that promote health. An additional aim is to describe a process evaluation that serves to increase knowledge about how the program leads to potential change by studying the implementation process and mechanisms of impact.

### Methods and analysis

The study will be a randomised controlled trial including 104 persons at risk for stroke. Persons at risk of stroke (n =52) will be randomised to an mHealth-supported stroke prevention program. Controls will have ordinary Primary healthcare (PHC) services. The 10-week programme will be conducted at PHC clinics, combining group meetings and online resources to support self-management of lifestyle change using engaging everyday activities as a mediator. Primary outcomes are stroke risk, lifestyle habits, and participation in health-promoting activities. Assessments will be performed at baseline and at follow-up (11 weeks and 12 months). Effects of the programme will be analysed using inferential statistics. Implementation will be analysed using qualitative and quantitative methods.

### Ethics and dissemination

The study has been approved by the Swedish Ethical Review Authority. Study results will be disseminated in peer-reviewed journals and at regional and international conferences targeting mixed audiences.

1  
2  
3 Strengths and limitations of this study  
4

- 5 • A robust randomised controlled trial (RCT) design will be used to investigate the  
6 effectiveness of the intervention programme.  
7  
8 • A process evaluation will provide rich data, useful for analysing the outcomes and the  
9 research process  
10  
11 • A limitation is that primary outcomes are based on self-reported data.  
12  
13 • An inclusion criterion is motivation for change which can skew the results and lower  
14 external validity.  
15  
16  
17  
18  
19  
20  
21  
22  
23  
24  
25  
26  
27  
28  
29  
30  
31  
32  
33  
34  
35  
36  
37  
38  
39  
40  
41  
42  
43  
44  
45  
46  
47  
48  
49  
50  
51  
52  
53  
54  
55  
56  
57  
58  
59  
60

For peer review only

## INTRODUCTION

In Sweden, a health care reform programme entitled “Good Quality Local Health Care—Primary Care Reform” (1) is currently paving the way for a large-scale transformation. The reform targets primary health care (PHC) specifically, and is designed to proactively address and prevent illness at an early stage to reduce the burden of non-communicable diseases (NCD), like stroke. The reform is in line with the United Nations Sustainable Development Goals, urging governments to reduce premature mortality from NCDs by 1/3 by year 2030 through prevention and treatment (2). By the age of 55, the risk for stroke increases considerably and doubles each decade afterward (3,4). Although the incidence of stroke has decreased in the general population, trends show an increase in stroke incidence in young adults (5). In Sweden, stroke incidence has declined by over 40% the last 15 years (6). However, both globally and in Sweden, cerebrovascular diseases like stroke continue to be the most common cause of death and impairment (7).

The individual, societal, and economic benefits of stroke prevention are high. Many of the stroke risk factors are largely addressable; e.g., smoking, obesity, type 2 diabetes, hypertension, physical inactivity, and dietary intake. The benefits of a healthy lifestyle are clear (4,8), however, the long-term effect (follow-up at 12 months or longer) of lifestyle interventions are not (9,10). For example, the effectiveness of PHC-based physical activity interventions is inconclusive (11). There is evidence for short-term improvements, but there is a lack of evidence for long-term effects (9). A multi-factorial approach to stroke prevention is warranted. A systematic review showed that multifactorial lifestyle habit interventions have greater potential effect on reducing risk factors than single-factor interventions (12). Preliminary evidence exists from a Swedish trial on a multifactorial lifestyle counselling program (13) that improved physical activity and dietary habits and reduced smoking and stress; however, the study was not conducted in PHC and did not have a control group. mHealth (a term for the combination of eHealth services and smartphone technology (14)) presents possibilities for accessibility and affordability when developing health services (15, 16) making it an excellent tool for designing stroke prevention models (17).

### Theoretical concept of the intervention program

1  
2  
3 The program is a complex intervention, and the Medical Research Council (MRC)  
4 guidance for developing and evaluating complex interventions (18) has been utilised  
5 in the design of the study. MRC suggest several key elements and stages;  
6  
7 Development, Feasibility/piloting, Evaluation, and Implementation. This randomised  
8 controlled trial (RCT) evaluates the effectiveness and implementation of the Make My  
9 Day (MMD) programme and is based on already-completed or ongoing studies  
10 concerning development and feasibility.  
11  
12  
13  
14  
15  
16

### 17 *Engaging everyday activity*

18 In the MMD programme, engaging everyday activities (EEA) are seen as the means  
19 and goal for changing and sustaining a healthy lifestyle in the intervention program,  
20 and while it is not a new concept, it has not been studied in relation to changing  
21 lifestyle habits to prevent NCDs. EEA is defined as a special type of activity that: is  
22 based on individual experience, filled with meaning, and gives a sense of intense  
23 participation and enthusiasm to the individual (19, 20). Examples from previous  
24 studies show that EEA can include a variety of activities such as working, playing  
25 computer games, and reading books. We recently showed that an intervention  
26 programme targeting cardiovascular disease prevention could benefit from  
27 incorporating health promoting EEA (21). The complexity of changing lifestyle habits  
28 has been described as a paradox between EEA and health (22). Even though EEA is  
29 subjectively meaningful and engaging to an individual, it might have an arguably  
30 negative impact on health; for example, engagement in sedentary activity or in  
31 unhealthy behaviours (22). In the current project, EEAs are seen as having the  
32 potential to change everyday activity patterns, and when carefully designed (for  
33 example, listening to an audiobook while taking a walk), incorporate a routine that  
34 promotes sustainable health among persons at risk for stroke. Studies have shown  
35 that promoting EEAs can have positive health impacts for older adults (23–25).  
36 Studies on populations that live lives that incorporate EEAs combined with moderate-  
37 intensity physical activities and a healthy diet indicate a strong relation to wellbeing,  
38 longevity, and cultural context (4,5).  
39  
40  
41  
42  
43  
44  
45  
46  
47  
48  
49  
50  
51  
52  
53  
54

55  
56 Current state-of-the art in stroke prevention suggest the need for a multifactorial PHC  
57 intervention that address modifiable risk factors for stroke based on individual needs  
58  
59  
60

1  
2  
3 and engagement in everyday activities that promote health with the support of a  
4 mHealth service.  
5  
6

### 7 8 **Objectives of the proposed study**

9 The main aim of the study is to evaluate the impact of an inter-disciplinary team-  
10 based, mHealth-supported prevention intervention in primary health care (PHC) —  
11 mediated with engaging everyday activities that promote health—to decrease stroke  
12 risk (primary outcome), and increase participation in engaging everyday activities and  
13 Health Related Quality of Life (HRQoL). The aim is also to describe a process  
14 evaluation that serves to increase knowledge about how the program leads to  
15 potential change by studying the implementation process and mechanisms of impact.  
16  
17  
18  
19  
20  
21  
22

### 23 **Hypothesis**

24 We hypothesise that the Make My Day (MMD) intervention programme is more  
25 beneficial than regular PHC services (control group) in decreasing stroke risk  
26 (primary outcome). We also hypothesised that MMD is more beneficial than regular  
27 PHC in increasing a) participation in health promoting EEAs, and b) HRQoL.  
28  
29  
30  
31  
32

## 33 **METHODS AND ANALYSIS**

### 34 **Design**

35 The study will be a randomised, assessor-blinded, controlled trial of persons at risk  
36 for stroke. The process evaluation answers questions as to what interventions were  
37 delivered and how by combining qualitative interviews and descriptive quantitative  
38 data on the implementation, casual mechanisms, and contextual variation (26).  
39  
40  
41  
42  
43  
44  
45

### 46 **Study setting**

47 The study will be conducted in close collaboration with four PHC clinics in the  
48 Stockholm area (different parts of Stockholm to represent a diversity in geographical  
49 area). PHC clinics in this study are rehabilitation units involving dietitians,  
50 physiotherapists, and occupational therapists. In Region Stockholm, rehabilitation  
51 units are often both organisationally and geographically separate from general  
52 practitioner (GP) primary health care clinics. These primary health care rehabilitation  
53 units have an agreement with the County Council in Stockholm, and are available for  
54 patients to choose from without the need of a referral for treatment by certified  
55  
56  
57  
58  
59  
60

1  
2  
3 physiotherapists, occupational therapists, and dieticians. PHC services are publicly  
4 funded in Sweden.  
5  
6

### 7 **Sample size and power considerations**

8  
9 The primary outcome is stroke risk, with emphasis on modifiable stroke risk factors.  
10 Based on data from a case study (27), we calculate a decrease of at least one level  
11 of stroke risk (e.g., moving from high risk to medium risk in the Stroke Risk Score  
12 Card (28)) with a standard deviation of 1.5, statistical power of 80%, with two-tailed  $\alpha$   
13 =0.05. Under these assumptions, the required sample size was 35 in each group (in  
14 total n=70). The Stroke Risk Score Card was developed as an easy-to-use self-  
15 assessment tool by the National Stroke Association in the United Kingdom (28). The  
16 tool has been used previously in a few studies to detect risk factors of stroke (27,28)  
17 and in a recently-finished pilot study conducted in the research group (publication in  
18 manuscript). Since the Stroke Risk Score Card has not been sufficiently tested  
19 psychometrically, power calculations were added for performance in EEAs. Assuming  
20 a difference on performance in EEAs of two points (as measured with the Canadian  
21 Occupational Performance Measure, COPM (29)) a power of 0.8 and a two-sided p  
22 value of 0.05 a sample size of 40 participants in each group would be sufficient.  
23  
24  
25  
26  
27  
28  
29  
30  
31  
32  
33  
34

35 To safeguard against dropouts (a maximum 30% dropout rate is assumed), a total of  
36 104 participants will be enrolled in the study (52 in each group).  
37  
38  
39  
40

### 41 **Participants: Recruitment and eligibility criteria**

42  
43 Persons at risk of stroke will be included in the project and participants will be  
44 recruited via advertisements in social media, a webpage, and flyers at PHCs. A  
45 stroke risk online screening survey will be used to find eligible participants. Inclusion  
46 criteria for the study are a) three or more risk factors deemed 'high risk' using the  
47 Stroke Risk Score Card, b) motivation for lifestyle change and to participate in a  
48 digital lifestyle intervention (including use of a smart phone), d) aged between 55–75  
49 years old, and without a diagnosis of dementia or cognitive impairment hindering  
50 participation. Exclusion criteria include having previously had a stroke or a trans-  
51 ischemic attack diagnosis, lack of understanding of the Swedish language, and not  
52 being able to use a mobile phone application. A total sample of n =104 participants  
53 (persons at risk of stroke), divided into two arms (52+52) for intervention and controls  
54  
55  
56  
57  
58  
59  
60

1  
2  
3 is estimated. Block randomisation will be utilised with a block size of four (25).  
4 Allocation will be done following baseline assessment by a researcher not involved in  
5 data collection nor intervention. The assessors of outcomes will be blinded to  
6 allocation until the end of the study.  
7  
8  
9

10  
11 In addition, next of kin to persons at risk for stroke in the intervention group are also  
12 invited to answer questions (survey and interview) regarding support of their relative.  
13 Persons at risk for stroke who do not have a next of kin will not be excluded from the  
14 study. PHC professionals that have been trained and delivered the interventions  
15 programme will be additional participants in the process evaluation of the study.  
16 Stakeholders (such as leaders at the involved PHC clinics) will be invited to individual  
17 interviews.  
18  
19  
20  
21  
22  
23

### 24 25 **Informed consent**

26 Written informed consent will be obtained from all participants (persons at risk, their  
27 next of kin, and PHC staff and stakeholders) at the start of recruitment. Information  
28 about the study will be given in written and verbal forms during meetings with  
29 research staff. Persons at risk will be asked to identify a next of kin that will be asked  
30 to participate by the researchers.  
31  
32  
33  
34  
35  
36

### 37 38 **Make My Day—a stroke-prevention program**

39 The MMD intervention program enables healthy activity patterns and aims to reduce  
40 the risk of stroke by means of four strategies: a) the incorporation of health-promoting  
41 EEAs, b) the use of mobile phone technology (mHealth) to increase health literacy,  
42 and awareness of current habits and fostering self-management, c) setting realistic  
43 goals that form new habits that prompt conscious decisions for healthy choices and  
44 habits, and d) sharing experience in a learning environment.  
45  
46  
47  
48  
49  
50

### 51 *Duration and specific content of the intervention programme*

52 The MMD stroke intervention programme is a 10-week group programme consisting  
53 of five sessions over the first five weeks, followed by a sixth booster session five  
54 weeks later. During the intervention, participants will work actively on self-chosen  
55 goals, EEAs, and habits to change behaviour and lifestyle. A mobile phone app will  
56 be used by participants throughout the 10 weeks, supporting their awareness of  
57  
58  
59  
60



current lifestyle habits and everyday activities. To form new habits, common situations will be used to cue behaviour change, like seeing an elevator and looking for the staircase, prompting health-promoting behaviour, and making a conscious decision to walk the stairs (30). The continuation of a change process is expected from the participants following the 10-week program period, and strategies for self-management are anticipated.

Each session (90 min) has a theme and includes some type of activity such as exercise, making a light snack, or taking a walk. Group dynamics and personal experience are used to reflect on EEAs in relation to health, doing and future goals. The sessions and content, presented in Table 1, are delivered by a trained health professional, for example an occupational therapist, physiotherapist, or dietician. There are sessions week 1-5 and week 10. During week 6-9, no sessions are held, instead the participants are expected to self-manage these weeks with the support of a mobile phone app.

The health care professionals who will provide the MMD program/intervention will participate in structured education specially designed for this program. This education will be given in an on-site and digital combination on three occasions, and will be held by two research team members with extensive experience in pedagogy and in the research protocol. In addition, the health professionals will have access to a digital educational platform with rich and varied material, and all material to be used during the 10-week programme. To avoid contamination, the health professionals are instructed to not deliver the 10-week program to other patients during the research period.

Table 1: Summary of session themes, concepts, and activities supporting a change process.

| Week | Session theme                                               | Profession             | Concepts                                                                                  | Activity                                                                |
|------|-------------------------------------------------------------|------------------------|-------------------------------------------------------------------------------------------|-------------------------------------------------------------------------|
| 1    | 1: Risk factors for stroke and engaging everyday activities | Occupational therapist | Health literacy concerning stroke risk, engaging activities, change process, expectations | Peer interview on engaging activities. Learn how to register in the app |
| 2    | 2: Physical activity                                        | Physiotherapist        | Physical activity, physical inactivity                                                    | Try a physical group exercise class at a gym                            |



|    |                                                                   |                         |                                                                                                                             |                                                                  |
|----|-------------------------------------------------------------------|-------------------------|-----------------------------------------------------------------------------------------------------------------------------|------------------------------------------------------------------|
| 3  | 3: Diet and health                                                | Dietician               | Dietary routines and change                                                                                                 | Food lab—prepare and test; e.g., healthy snacks/sandwiches       |
| 4  | 4: Balanced everyday life                                         | Occupational therapist  | Activity balance and stressors                                                                                              | Relaxation—such as medical yoga or meditation                    |
| 5  | 5: The meaning of healthy habits, routines, and activity patterns | One of the team members | Current and desired routines/habits, activity patterns and resources                                                        | Walk-and-talk—e.g., in a forest or a historical walk in the city |
| 10 | 6: Booster session: Evaluation and the road ahead                 | Occupational therapist  | Self-management, sustainability, view of the self, social support, revisiting goals/new goals, and social aspects of health | Preparing healthy snacks and group reflection on the program     |

### *The mobile phone app*

The app for the pilot project was produced by collaboration with ScientificMed Tech AB (now part of Cuviva AB) (<http://www.scientificmed.com>), and for the current project the app has been modified based on previous experiences of the users and the researchers. A workshop with the pilot study participants, researchers and the company showed that the participants wanted the app to be more tailored to their needs with a more user-friendly interface. Both the researchers and the users wanted feedback to be relevant and tailored to the users progress thus supporting change and awareness. As with the previous version, the new version of the app includes six domains for registering daily activities, experiences, and behaviours (see Figure 1 for examples from the app): my goals (goal achievements on three pre-set goals); physical activity and steps (step counts, 24-hour time use in relation to exercise, moderately intense activities, sleep, sedentary activities, and other activities); engaging activities (participating in health-promoting EEAs); tobacco and alcohol use (consumption); stress (perceived time-pressure); and dietary habits (consumption of fruits/vegetables, breakfast, fish and snacks—not included in the figure). Domains are based on modifiable risk factors for stroke, as presented by the American Heart Association (3), with the addition of health-promoting EEAs and stress reduction.

-Insert Figure 1 here-

### **Data collection**

#### *Persons at risk for stroke*

Data collection with a research assistant starts with an individual meeting (baseline) with all eligible participants, just before the meeting (baseline minus 2 days), during

1  
2  
3 which participants are sent a link to an online survey for collecting self-reported  
4 measures. During baseline assessment, all participants (including controls) will be  
5 informed of their stroke risk factors. Motivational interviewing techniques will be used  
6 to identify three problem areas in relation to lifestyle habits and stroke risk factors,  
7 and these areas will be used to formulate three lifestyle change goals. Allocation  
8 (randomisation) will be done following baseline assessment. Allocation sequences  
9 will be done by an independent researcher not involved in data collection or  
10 intervention. The researchers who are assessors of outcomes will be blinded to  
11 allocation until the end of the study. The assessments measuring primary and  
12 secondary outcomes will be collected at baseline, at follow-up (11 weeks), and at 12  
13 months; see Table 2. Demographic data will be collected at baseline. Process data  
14 will be collected continuously. Controls will be offered standard care by PHCs as  
15 needed during the 12 months study period.

### 26 27 *Outcome data*

28 Outcome assessment methods were carefully chosen to assure methods that are  
29 valid and reliable and will capture change. The primary outcome measure is risk for  
30 stroke, measured by the Swedish version of the *Stroke Riskometer* (30,31) and the  
31 ~~Stroke Risk Score Card (27, 28)~~. Secondary outcomes include participation in health-  
32 promoting everyday activities, measured by the *Canadian Occupational Performance*  
33 *Measure*, (COPM) (32), and self-rated health measured using *LiSat-11* (33) and *EQ-*  
34 *5D* (34). Other measures are lifestyle habits (measured using the updated *Swedish*  
35 *Lifestyle Survey*, *Levnadsvaneenkäten*) (35), and activity patterns, as measured  
36 using the Swedish version of the *Productivity Pleasure and Restoration Profile* (36,  
37 37). Survey data will be gathered for health literacy of stroke risk (38), experiences of  
38 time pressure (stress), cost effectiveness (e.g., self-reported sick leave; health care  
39 utilisation, and use of medication), readiness and motivation for change (39), current  
40 mobile phone use, and mapping out engaging everyday activities. Habitual physical  
41 activity will be measured using the activPAL® micro activity monitor (PAL  
42 Technologies Ltd., Glasgow, UK) (40). The activPAL is a small device which provides  
43 information on position and acceleration of the body. The monitor is attached to the  
44 thigh and will be worn for five consecutive days after baseline and at follow-up (11  
45 weeks and 12 months). Outcomes from the monitor are 1) time spent sitting/lying,  
46 standing, stepping, 2) numbers of step counts, and 3) sit-to-stand transitions.

### *Outcome data- next of kin*

We will collect data from next of kin to the participants in the intervention group via an online survey. The survey will include demographic measures of health and questions on their view of the program and the support they have given their kin during the intervention period.

### *Process data*

The process evaluation will illuminate casual mechanisms and help identify factors that are associated with variation in outcomes, such as contextual and external factors (26). Process data include both qualitative and quantitative descriptive data, including logbooks from PHC staff (notes taken during delivery of the program), course evaluations from the web-based staff training, and semi-structured exit interviews with participants at risk for stroke and their next of kin, see Table 2. Fidelity will be evaluated as the extent to which the programme was delivered as expected. Dose will be assessed as the quantity of the implemented intervention. Adaptation, such as changes made to fit different PHC settings, will be collected during interviews with PHC staff. Reach will be assessed regarding how many eligible patients signed up and how many completed the MMD program. In addition, adverse events will be registered. Context includes external factors that may act as a barrier or facilitator to the implementation itself and to the interventions' effects. Assessing barriers and facilitators to program implementation will also involve evaluating program feasibility; i.e., the extent to which stakeholders regard the MMD as satisfactory in terms of content and complexity/difficulty.

Data will be managed using an online software called RedCap (<https://www.project-redcap.org/>) in combination with a local data management system.

### *Participant timeline*

Participant enrollment started in April 2022, and in June 2023 all 104 participants had been included. The last groups' 12-month follow-up will occur in March 2024 (marking the end of the study). In total, five intervention groups, each consisting of 10–12 participants will receive the prevention program during the study.

Table 2: Summary of measures to be collected

|                                                                  | Instrument and scale                                                                                                       | Time points |
|------------------------------------------------------------------|----------------------------------------------------------------------------------------------------------------------------|-------------|
| <b>Primary outcome measures from persons at risk for stroke:</b> |                                                                                                                            |             |
| Stroke risk                                                      | The Stroke Riskometer*, the Stroke risk score card*                                                                        | t1, t2, t3  |
| <b>Secondary outcome measures:</b>                               |                                                                                                                            |             |
| Participation in everyday activities                             | COPM, PPR profile*                                                                                                         | t1, t2, t3  |
| Physical activity (habitual)                                     | ActivPal                                                                                                                   | t1, t2, t3  |
| Life satisfaction                                                | EQ-5D*, LiSat-11*                                                                                                          | t1, t2, t3  |
| Lifestyle habits                                                 | The Swedish Lifestyle Habits Questionnaire*                                                                                | t1, t2, t3  |
| <b>Demographics and measures:</b>                                |                                                                                                                            |             |
| Age                                                              | Year*                                                                                                                      | t1          |
| Gender                                                           | Male/Female/Other*                                                                                                         | t1          |
| Ethnic background                                                | Mother tongue*, place of birth*                                                                                            | t1          |
| Height                                                           | Cm                                                                                                                         | t1          |
| Weight                                                           | Kg*                                                                                                                        | t1, t2, t3  |
| Living situation                                                 | Living alone or not*                                                                                                       | t1, t3      |
| Yearly income                                                    | In Swedish crona*                                                                                                          | t1, t3      |
| Employment status                                                | Part-time, full-time, sick-leave, unemployed, student, retired*                                                            | t1, t3      |
| Level of education                                               | Years of education*                                                                                                        | t1          |
| Blood pressure                                                   | mmHg                                                                                                                       | t1, t2, t3  |
| Health literacy                                                  | Knowledge of stroke                                                                                                        | t1, t2, t3  |
| Motivation for change                                            | Self-reported, ordinal scale                                                                                               | t1          |
| Cost effectiveness                                               | Self-reported sick-leave and absence from work past six months; health care utilisation past six months; Use of medication | t1, t2, t3  |
| <b>Experiences of next of kin:</b>                               | Self-reported health and support*                                                                                          | t2, t3      |
| <b>Process data:</b>                                             |                                                                                                                            |             |

|                          |                                                                                                |    |
|--------------------------|------------------------------------------------------------------------------------------------|----|
| Fidelity and adaptations | Interviews with interventionists on delivery of intervention. Log-books from interventionists. | t2 |
| Dose                     | Log-books from interventionists.                                                               | t2 |

t1 =Baseline; t2 =One week following intervention ending; t3 =12 months follow-up post baseline

\* = measures collected via an online survey

## Data Analysis Plan

### *Outcomes on effects*

The characteristics of all persons at risk for stroke at inclusion, and outcomes at 11 weeks and 12 months after inclusion, will be presented with descriptive statistics. The treatment effects in the RCT study will be analysed on an intention-to-treat basis, with randomised participants retaining their original allocated group, and measured as differences between groups at follow-up and at 12 months considering plausible confounders. Outcome data will be examined for outliers, normality, and missing data. Analyses of covariance will be used for continuous outcomes, with baseline values as covariates. Logistic regression analyses will be used for dichotomous outcomes. The level of significance will be set at  $p \leq 0.05$  and the confidence level at 95%. We will use SPSS to analyse the data. Analyses will provide results for the relative effectiveness of the intervention program. The results will be reported accordance to CONSORT recommendations for reporting randomised controlled trials on non-pharmacological treatments (41) and the protocol has been reported according to the SPIRIT reporting guidelines (42).

### *Process evaluation*

A mixed method approach where qualitative and quantitative data is integrated will be used to answer how the implementation process and potential mechanisms of impact can explain the outcomes of the MMD intervention.

Data collected from surveys, logbooks on recruitment and dropout, and logs from the app registrations will be entered, analysed, and summarised. Descriptive statistical analyses will be conducted to report on the study's feasibility: recruitment, drop-outs,

1  
2  
3 retention rate, and adherence. Data from app registrations will be used to report on  
4 feasibility and usability. Qualitative interviews will be transcribed verbatim and  
5 analysed using thematic qualitative analyses.  
6  
7

## 8 9 **Patient and Public Involvement**

10  
11  
12  
13 The experiences and input from persons at risk for stroke participating in previous  
14 studies on the feasibility of the Make My Day programme have informed the  
15 development of research questions, materials, and research processes for the  
16 current study. The process evaluation will assess the participants burden of the  
17 intervention and time required to participate in the research. We plan to disseminate  
18 the study results to all participants in a Swedish report and to ask the participants to  
19 comment on the report.  
20  
21

## 22 23 **Discussion**

24  
25 Several NCDs share the same risk factors as stroke, and an intervention program  
26 has the potential to address other NCDs and health in general and should overlap  
27 with other health-promoting strategies (3). In the proposed study we will evaluate the  
28 MMD program in regard to decreasing stroke risk by using broad strategies and  
29 addressing multiple factors of relevance. The theoretical base of the protocol is  
30 grounded on EEAs as the mediator and goal for decreasing stroke risk and  
31 sustaining personally-relevant healthy living habits. It is important to note that the  
32 concept of personal relevance can mean that in a total week of different activities,  
33 some engaging activities can potentially be considered unhealthy (i.e., unhealthy  
34 eating activity), but the overall pattern of participation in EEA could be designed to  
35 include health-promoting EEA as this study promotes. The paradoxicality of EEAs is  
36 that the feeling of being engaged can be just as important for health and wellbeing as  
37 being physically active (43). Living habits thus needs to be seen as part of a broader  
38 life context, in which health and EEAs are continuously renegotiated and thus need  
39 to be regularly reassessed within the context of each person's life situation.  
40  
41  
42  
43  
44  
45  
46  
47  
48  
49  
50

51  
52 During the COVID-19 pandemic there was a strong increase in online primary health  
53 care consultations in Sweden, especially for younger patients with high economical  
54 and educational backgrounds who were born in Sweden; meanwhile the older  
55 population sought less care and preferred face-to-face consultations (44). Although  
56 there is a possibility to deliver the MMD intervention programme completely online  
57  
58  
59  
60

1  
2  
3 (no physical meetings), we have decided to run the programme meetings face-to-  
4 face. During the 12-month follow-up of the pilot study, which occurred at the end of  
5 2020, participants rated physical meet-ups (the possibility of exchanging experiences  
6 with other at-risk persons and group leaders) as highly valued; which is in line with  
7 previous studies that showed that a blended intervention approach can be efficient  
8 compared to only online or on-site intervention (45). However, whether multiple face-  
9 to-face consultations (doses) would be the most efficient is not clear, and is one of  
10 the questions for the process evaluation.  
11  
12  
13  
14  
15  
16  
17

18 The possible limitation of the study will be the reliability of self-reported measures,  
19 and there is a risk of bias since reporting might not be accurate, therefore measures  
20 such as activPAL, BMI, and blood pressure are complementing the assessments.  
21 Although we have planned for five days of activPAL wear (the recommendation is  
22 seven days), participants will wear these 24/7, and we will monitor data loss. External  
23 validity of the outcomes could be flawed, due to a recruitment process mainly  
24 benefiting highly-motivated persons at risk of stroke, and the risk of dropouts in less-  
25 motivated participants. The power calculations are based on a stroke risk score that  
26 has to our knowledge not been used for power calculations previously nor in  
27 intervention studies. However, this is the score used in our previous pilot study and  
28 most relevant to use, since the aim of the study focus on modifiable risk factors which  
29 is covered in the score. In addition, we have added a power calculation on a  
30 secondary outcome.  
31  
32  
33  
34  
35  
36  
37  
38  
39  
40

41 Ethical dilemmas include that controls are not being supported in the same way as  
42 the intervention group and that the recruitment methods could be skewed and fail to  
43 reach out to vulnerable groups in society (lower SES) at risk for stroke. The strength  
44 of the study lies in the robustness of the RCT design, the process evaluation, and the  
45 interprofessional collaboration in a clinical PHC context. The data from the process  
46 evaluation will increase and ease the possibility of implementation of a prevention  
47 program for NCDs in PHC. The risk of contamination between control and  
48 intervention is deemed minimal, as participants are recruited via social media in a  
49 large city.  
50  
51  
52  
53  
54  
55  
56  
57

## 58 **ETHICS AND DISSEMINATION**

59  
60



1  
2  
3 An approval from the Swedish Ethical Review Authority, Sweden has been granted  
4 (Ref. numbers. 2015/834-31, 2016/2203-32, 2019/01444 and 2021-05902-02). Data  
5 management will be complying with the general data protection regulation, GDPR,  
6 and all data will be stored securely to protect the confidentiality. Participation in the  
7 study is not expected to lead to health risks or complications, and potential health  
8 consequences will be monitored. Participant who experiences any health-related  
9 problems during the study will be guided to contact their GP. Participants may  
10 choose to interrupt their participation in the study at any time. Researchers can also  
11 discontinue a participant's participation based on health issues, or reasons that might  
12 jeopardise that person's safety. Reasons for interruption will be recorded. For a  
13 summary of the consent form, see online supplemental 1.  
14  
15  
16  
17  
18  
19  
20  
21  
22

23 The findings of the study will be published in peer-reviewed journals, and the results  
24 will be disseminated to participants, the public, PHC staff, and decision-makers  
25 through national and international conferences, as well as study-specific web pages.  
26  
27  
28

### 29 **AUTHOR CONTRIBUTIONS**

30  
31 AHP, EA, and SG conceived the original idea and outline of the study. AHP is  
32 implementing the protocol in primary healthcare settings, with regular dialog and  
33 review by CO, EÅ, GN, EA, and SG. CO, MH, GN, and EÅ contributed to the design  
34 of the study. AHP wrote the study protocol, together with EA and EJ. All authors  
35 discussed and commented on draft versions and approved the final version.  
36  
37  
38  
39  
40

### 41 **FUNDING STATEMENT**

42  
43 This work was funded by grants from FORTE, grant number 2020-00175. This  
44 funding source had no role in the design of this study and will not have any role  
45 during its execution, analyses, interpretation of the data, or decision to submit results.  
46  
47  
48  
49

### 50 **COMPETING INTERESTS**

51 The authors declare that they have no competing interests.  
52  
53  
54  
55  
56  
57  
58  
59  
60



## REFERENCES

1. Government S. Good quality, local health care—A primary care reform ). [http://www.sou.gov.se/wp-content/uploads/2018/06/Summary-SOU-2018.39\\_Final2.pdf](http://www.sou.gov.se/wp-content/uploads/2018/06/Summary-SOU-2018.39_Final2.pdf); 2018. Report No.: SOU 2018:39.
2. Assembly. UNG. Transforming our world: The 2030 Agenda for sustainable development. 2016 2022-11-30. Available from: <https://documents-dds-ny.un.org/doc/UNDOC/GEN/N15/291/89/PDF/N1529189.pdf?OpenElement>
3. Habner J. Preventing stroke: Uneven progress. A global policy research programme. 2017.
4. Goldstein LB, Bushnell CD, Adams RJ, Appel LJ, Braun LT, Chaturvedi S, et al. Guidelines for the primary prevention of stroke: a guideline for healthcare professionals from the American Heart Association/American Stroke Association. *Stroke*. 2011;42(2):517–84.
5. Béjot Y, Bailly H, Durier J, Giroud M. Epidemiology of stroke in Europe and trends for the 21st century. *La Presse Médicale*. 2016;45(12, Part 2):e391–e8.
6. Welfare TNBoHa. Statistics on Stroke 2020. 2021. Contract No.: Art no. 2021-12-7644.
7. Organization) WWH. The top 10 causes of death 2020 [Available from: <https://www.who.int/news-room/fact-sheets/detail/the-top-10-causes-of-death>.
8. Chiuve SE, Rexrode KM, Spiegelman D, Logroscino G, Manson JE, Rimm EB. Primary prevention of stroke by healthy lifestyle. *Circulation*. 2008;118(9):947–54.
9. Eakin EG, Glasgow RE, Riley KM. Review of primary care-based physical activity intervention studies: effectiveness and implications for practice and future research. *Database of Abstracts of Reviews of Effects (DARE): Quality-assessed Reviews [Internet]: Centre for Reviews and Dissemination (UK)*; 2000.
10. Weiss EC, Galuska DA, Khan LK, Gillespie C, Serdula MK. Weight regain in US adults who experienced substantial weight loss, 1999–2002. *American journal of preventive medicine*. 2007;33(1):34–40.
11. Hillsdon M, Thorogood M, White I, Foster C. Advising people to take more exercise is ineffective: a randomized controlled trial of physical activity promotion in primary care. *Int J Epidemiol*. 2002;31(4):808–15.
12. Sisti L, Dajko M, Campanella P, Shkurti E, Ricciardi W, De Waure C. The effect of multifactorial lifestyle interventions on cardiovascular risk factors: a systematic review and meta-analysis of trials conducted in the general population and high risk groups. *Preventive medicine*. 2018;109:82–97.
13. Lönnberg L, Ekblom-Bak E, Damberg M. Improved unhealthy lifestyle habits in patients with high cardiovascular risk: results from a structured lifestyle programme in primary care. *Uppsala journal of medical sciences*. 2019;124(2):94–104.
14. Adibi S. *Mobile Health: A Technology Road Map*. Adibi S, editor: Springer; 2015.
15. Zonneveld M, Patomella A-H, Asaba E, Guidetti S. The use of information and communication technology in healthcare to improve participation in everyday life: a scoping review. *Disability and Rehabilitation*. 2019:1–8.
16. Chow CK, Ariyaratna N, Islam SM, Thiagalingam A, Redfern J. mHealth in Cardiovascular Health Care. *Heart Lung Circ*. 2016;25(8):802–7.
17. Owolabi MO, Thrift AG, Mahal A, Ishida M, Martins S, Johnson WD, et al. Primary stroke prevention worldwide: translating evidence into action. *The Lancet Public Health*. 2021.
18. Skivington K, Matthews L, Simpson SA, Craig P, Baird J, Blazeby JM, et al. Framework for the development and evaluation of complex interventions: gap analysis, workshop and consultation-informed update. 2021.

19. Jonsson H. A new direction in the conceptualization and categorization of occupation. *Journal of occupational science*. 2008;15(1):3–8.
20. Jonsson H, Josephsson S, Kielhofner G. Narratives and experience in an occupational transition: a longitudinal study of the retirement process. *Am J Occup Ther*. 2001;55(4):424–32.
21. Mälstam E, Asaba E, Åkesson E, Guidetti S, Patomella A-H. 'Weaving lifestyle habits': Complex pathways to health for persons at risk for stroke. *Scandinavian journal of occupational therapy*. 2021:1–13.
22. Asaba E, Bergström A, Patomella AH, Guidetti S. Engaging occupations among persons at risk for stroke: A health paradox. *Scandinavian journal of occupational therapy*. 2020:1–10.
23. Clark F, Azen SP, Zemke R, Jackson J, Carlson M, Mandel D, et al. Occupational therapy for independent-living older adults. A randomized controlled trial. *JAMA*. 1997;278(16):1321–6.
24. Clark F, Jackson J, Carlson M, Chou CP, Cherry BJ, Jordan-Marsh M, et al. Effectiveness of a lifestyle intervention in promoting the well-being of independently living older people: results of the Well Elderly 2 Randomised Controlled Trial. *J Epidemiol Community Health*. 2012;66(9):782–90.
25. Mountain G, Windle G, Hind D, Walters S, Keertharuth A, Chatters R, et al. A preventative lifestyle intervention for older adults (lifestyle matters): a randomised controlled trial. *Age Ageing*. 2017;46(4):627–34.
26. Moore GF, Audrey S, Barker M, Bond L, Bonell C, Hardeman W, et al. Process evaluation of complex interventions: Medical Research Council guidance. *BMJ*. 2015;350.
27. Patomella A-H, Farias L, Eriksson C, Guidetti S, Asaba E. Engagement in Everyday Activities for Prevention of Stroke: Feasibility of an mHealth-Supported Program for People with TIA. *Healthcare*. 2021;9(8):968.
28. Association NS. Stroke Risk Score Card 2018 [Available from: <https://www.stroke.org/stroke-risk-scorecard-2018/>].
29. Cup EH, op Reimer WS, Thijssen MC, van Kuyk-Minis M. Reliability and validity of the Canadian Occupational Performance Measure in stroke patients. *Clinical rehabilitation*. 2003;17(4):402.
30. Feigin V, Norrving B, Krishnamurthi R, Barker-Collo S, Wang W, Fu HUA, et al. Stroke Riskometer app: A new promising approach for primary stroke prevention and epidemiological research on stroke and other major non-communicable disorders (NCD) across the globe. *International Journal of Stroke*. 2015;10:101–2.
31. Medvedev O, Truong QC, Merkin A, Borotkanics R, Krishnamurthi R, Feigin V. Cross-cultural validation of the stroke riskometer using generalizability theory. *Scientific Reports*. 2021;11(1):1–10.
32. Law M, Baptiste S, McColl M, Opzoomer A, Polatajko H, Pollock N. The Canadian occupational performance measure: an outcome measure for occupational therapy. *Can J Occup Ther*. 1990;57(2):82–7.
33. Fugl-Meyer AR, Melin R, Fugl-Meyer KS. Life satisfaction in 18-to 64-year-old Swedes: in relation to gender, age, partner and immigrant status. *Journal of rehabilitation medicine*. 2002;34(5):239–46.
34. Burstrom K, Johannesson M, Diderichsen F. Swedish population health-related quality of life results using the EQ-5D. *Qual Life Res*. 2001;10(7):621-35.
35. Socialstyrelsen. Nationella riktlinjer för prevention och behandling vid ohälsosamma levnadsvanor. 2018.
36. Atler KE. User-perceived utility of the Daily Experiences of Pleasure, Productivity, and Restoration Profile. *Can J Occup Ther*. 2015;82(4):235–44.
37. Atler KE, Barney L, Moravec A, Sample PL, Fruhauf CA. The Daily Experiences of Pleasure, Productivity, and Restoration Profile: A case study: Etude de cas sur l'utilite du Daily Experiences of Pleasure, Productivity, and Restoration Profile. *Can J Occup Ther*. 2017;84(4-5):262–72.
38. Dearborn JL, McCullough LD. Perception of risk and knowledge of risk factors in women at high risk for stroke. *Stroke*. 2009;40(4):1181–6.

- 1  
2  
3 39. Prochaska JO, Redding CA, Evers KE. The transtheoretical model and stages of change.  
4 Health behavior: Theory, research, and practice. 2015;125–48.  
5 40. Aguilar-Farías N, Brown WJ, Peeters GG. ActiGraph GT3X+ cut-points for identifying  
6 sedentary behaviour in older adults in free-living environments. Journal of science and medicine in  
7 sport. 2014;17(3):293–9.  
8 41. Boutron I, Moher D, Altman DG, Schulz KF, Ravaud P. Extending the CONSORT  
9 statement to randomized trials of nonpharmacologic treatment: explanation and elaboration. Annals  
10 of internal medicine. 2008;148(4):295–309.  
11 42. Chan A-W, Tetzlaff JM, Altman DG, Laupacis A, Gøtzsche PC, Krleža-Jerić K, et al.  
12 SPIRIT 2013 Statement: Defining standard protocol items for clinical trials. Ann Intern Med.  
13 2013;158(3):200-207  
14 43. Asaba E, Bergström A, Patomella A-H, Guidetti S. Engaging occupations among persons  
15 at risk for stroke: a health paradox. Scandinavian journal of occupational therapy. 2020:1-10.  
16 44. Dahlgren C, Dackehag M, Wändell P, Rehnberg C. Determinants for use of direct-to-  
17 consumer telemedicine consultations in primary healthcare—a registry based total population study  
18 from Stockholm, Sweden. BMC family practice. 2021;22(1):1–10.  
19 45. Mouton A, Cloes M. Efficacy of a web-based, center-based or combined physical  
20 activity intervention among older adults. Health Education Research. 2015;30(3):422–35.  
21  
22  
23  
24  
25

26 Figure 1: An example of a checklist that shows the domains that the participants  
27 need to register in the app. Published with permission from ScientificMed  
28 Tech/Cuviva AB.  
29  
30  
31  
32  
33  
34  
35  
36  
37  
38  
39  
40  
41  
42  
43  
44  
45  
46  
47  
48  
49  
50  
51  
52  
53  
54  
55  
56  
57  
58  
59  
60



Figure 1: An example of a checklist that shows the domains that the participants need to register in the app. Published with permission from ScientificMed Tech/Cuviva AB.

751x1625mm (28 x 28 DPI)

## Summarized consent form: Make My Day- Primary prevention of stroke using engaging everyday activities as a mediator of sustainable health

### INFORMATION TO PARTICIPANTS IN THE PROJECT

We are asking if you are interested in participating in a research project. In this document you will receive information about the project and what participation entails.

#### WHAT IS THE PROJECT ABOUT AND WHY DO YOU WANT ME TO PARTICIPATE?

You are asked to participate in the study after responded to the advertisement for the study. To participate in the project, you must have at least three modifiable risk factors for stroke (examples of risk factors are high blood pressure, stroke in the family, low level of physical activity, overweight, smoking, high alcohol intake and unhealthy eating habits) and be 55-75 years old.

You also need to be able to participate in a health promotion program in a primary healthcare centre in the region. The program consists of physical meetings in a group at a nearby healthcare center (6 meetings over 10 weeks) and registration of lifestyle habits in a mobile phone app.

The study aims to evaluate a stroke prevention program that addresses modifiable risk factors for stroke. The research principal for the project is KI meaning that KI is the organization responsible for the study. The study has been approved by the Swedish Ethical Review Authority.

#### WHAT WILL HAPPEN DURING THE PROJECT?

You will initially be contacted by a researcher. You will then receive additional information about the study and be able to ask questions about what it means to participate.

If you want to participate in the study, you will meet with a researcher on three occasions to answer questions (at the start of the study, after eleven weeks and twelve months after the start of the study). You will also be able to answer questions via surveys digitally at home at your own pace. The questions will be about different aspects of your daily life with a focus on health. Each event on site will take about 1 hour and can take place either via a physical meeting or online. You will be offered to wear an activity tracker to measure your activity level. The activity tracker will record your physical movements (e.g., how long you spend in a sitting or standing position).

After the first meeting, you will be randomized to be a control for the study or to be in the prevention group. If you are randomized to the prevention group, you will be offered to participate in the 10-week prevention program at a healthcare center. We cannot control the randomization. You will be contacted after the randomization has been completed to find out which group you belong to.

If you are part of the prevention program, you will be asked to answer questions and to tell us how participating in the prevention program has worked for you. You will also be asked to identify a close relative who could consider answering a survey and being interviewed. You will not be excluded from participation in the study if you do not have a relative, it is not a requirement to be able to participate.

#### POSSIBLE CONSEQUENCES AND RISKS OF PARTICIPATING IN THE PROJECT

Participating in the project should not pose any risk to you. If you should experience any kind of discomfort during or after the completion of the questionnaires or measurements, you are asked to

1  
2  
3  
4  
5  
6  
7  
8  
9  
10  
11  
12  
13  
14  
15  
16  
17  
18  
19  
20  
21  
22  
23  
24  
25  
26  
27  
28  
29  
30  
31  
32  
33  
34  
35  
36  
37  
38  
39  
40  
41  
42  
43  
44  
45  
46  
47  
48  
49  
50  
51  
52  
53  
54  
55  
56  
57  
58  
59  
60

discontinue your participation. If you experience any discomfort or ill health during the study, you are asked to contact your healthcare center and then contact the responsible researcher. The healthcare center to which you belong will offer customary support to you if needed throughout the course of the study (i.e., the customary support via your healthcare center is not replaced by study participation).

#### WHAT HAPPENS TO MY DATA?

A researcher will collect and record information about you. Your answers and your results will be processed so that unauthorized persons cannot access them. No personal information that can be linked to you will be used, analyzed, or provided to a third party. The information is protected by regulations on confidentiality, which means that no unauthorized person may access the information. According to the EU's data protection regulation (GDPR), you have the right to access, free of charge, the information about you that is handled in the study and where we got it from, and if necessary to have any errors corrected. If you are dissatisfied with the way your personal data is processed, you have the right to lodge a complaint with the Swedish Authority for Privacy Protection.

#### HOW DO I GET INFORMATION ABOUT THE RESULT OF THE PROJECT?

During data collection sessions, you will be informed about your own test results. The study results will be presented at group level in reports, conferences and in scientific publications.

#### INSURANCE AND COMPENSATION

When participating in medical research you are covered by patient insurance, which is based on the Patient Injury Act (SFS 1996:799). No compensation is paid for participation in the study, for example no compensation is paid for lost income.

#### PARTICIPATION IS VOLUNTARY

Your participation is voluntary, and you can choose to cancel your participation at any time. If you choose not to participate or wish to cancel your participation, you do not need to state why, and it will not affect your future care or treatment.

#### RESPONSIBLE FOR THE PROJECT

Those responsible for the project are xxx:

1  
2  
3  
4  
5  
6  
7  
8  
9  
10  
11  
12  
13  
14  
15  
16  
17  
18  
19  
20  
21  
22  
23  
24  
25  
26  
27  
28  
29  
30  
31  
32  
33  
34  
35  
36  
37  
38  
39  
40  
41  
42  
43  
44  
45  
46  
47  
48  
49  
50  
51  
52  
53  
54  
55  
56  
57  
58  
59  
60

**Consent to participate in the study**

I have received oral and/or written information about the study and have had the opportunity to ask questions. I get to keep the written information.

- I agree to participate in the project: Stroke prevention – Development and evaluation of a person-centered, ICT-based intervention that supports a healthy activity pattern in everyday life in people who have an increased risk of suffering from a stroke

|                   |            |
|-------------------|------------|
| Location and Date | Signature  |
|                   |            |
|                   | Print name |
|                   |            |

For peer review only

# Reporting checklist for protocol of a clinical trial.

Based on the SPIRIT guidelines.

## Instructions to authors

Complete this checklist by entering the page numbers from your manuscript where readers will find each of the items listed below.

Your article may not currently address all the items on the checklist. Please modify your text to include the missing information. If you are certain that an item does not apply, please write "n/a" and provide a short explanation.

Upload your completed checklist as an extra file when you submit to a journal.

In your methods section, say that you used the SPIRIT reporting guidelines, and cite them as:

Chan A-W, Tetzlaff JM, Altman DG, Laupacis A, Gøtzsche PC, Krleža-Jerić K, Hróbjartsson A, Mann H, Dickersin K, Berlin J, Doré C, Parulekar W, Summerskill W, Groves T, Schulz K, Sox H, Rockhold FW, Rennie D, Moher D. SPIRIT 2013 Statement: Defining standard protocol items for clinical trials. *Ann Intern Med.* 2013;158(3):200-207

|                                   |                     | Reporting Item                                                                                               | Page Number                          |
|-----------------------------------|---------------------|--------------------------------------------------------------------------------------------------------------|--------------------------------------|
| <b>Administrative information</b> |                     |                                                                                                              |                                      |
| Title                             | <a href="#">#1</a>  | Descriptive title identifying the study design, population, interventions, and, if applicable, trial acronym | 1                                    |
| Trial registration                | <a href="#">#2a</a> | Trial identifier and registry name. If not yet registered, name of intended registry                         | 2                                    |
| Trial registration: data set      | <a href="#">#2b</a> | All items from the World Health Organization Trial Registration Data Set                                     | N/A a registration has not been done |
| Protocol version                  | <a href="#">#3</a>  | Date and version identifier                                                                                  | 2                                    |
| Funding                           | <a href="#">#4</a>  | Sources and types of financial, material, and other support                                                  | 20                                   |



|    |                      |                     |                                                          |               |
|----|----------------------|---------------------|----------------------------------------------------------|---------------|
| 1  | Roles and            | <a href="#">#5a</a> | Names, affiliations, and roles of protocol               | 20            |
| 2  | responsibilities:    |                     | contributors                                             |               |
| 3  | contributorship      |                     |                                                          |               |
| 4  |                      |                     |                                                          |               |
| 5  |                      |                     |                                                          |               |
| 6  | Roles and            | <a href="#">#5b</a> | Name and contact information for the trial sponsor       | N/A, no trial |
| 7  | responsibilities:    |                     |                                                          | sponsor       |
| 8  | sponsor contact      |                     |                                                          |               |
| 9  | information          |                     |                                                          |               |
| 10 |                      |                     |                                                          |               |
| 11 |                      |                     |                                                          |               |
| 12 |                      |                     |                                                          |               |
| 13 | Roles and            | <a href="#">#5c</a> | Role of study sponsor and funders, if any, in study      | N/A           |
| 14 | responsibilities:    |                     | design; collection, management, analysis, and            |               |
| 15 | sponsor and funder   |                     | interpretation of data; writing of the report; and the   |               |
| 16 |                      |                     | decision to submit the report for publication,           |               |
| 17 |                      |                     | including whether they will have ultimate authority      |               |
| 18 |                      |                     | over any of these activities                             |               |
| 19 |                      |                     |                                                          |               |
| 20 |                      |                     |                                                          |               |
| 21 |                      |                     |                                                          |               |
| 22 |                      |                     |                                                          |               |
| 23 | Roles and            | <a href="#">#5d</a> | Composition, roles, and responsibilities of the          | N/A           |
| 24 | responsibilities:    |                     | coordinating centre, steering committee, endpoint        |               |
| 25 | committees           |                     | adjudication committee, data management team,            |               |
| 26 |                      |                     | and other individuals or groups overseeing the trial,    |               |
| 27 |                      |                     | if applicable (see Item 21a for data monitoring          |               |
| 28 |                      |                     | committee)                                               |               |
| 29 |                      |                     |                                                          |               |
| 30 |                      |                     |                                                          |               |
| 31 |                      |                     |                                                          |               |
| 32 |                      |                     |                                                          |               |
| 33 | <b>Introduction</b>  |                     |                                                          |               |
| 34 |                      |                     |                                                          |               |
| 35 | Background and       | <a href="#">#6a</a> | Description of research question and justification       | 7-9           |
| 36 | rationale            |                     | for undertaking the trial, including summary of          |               |
| 37 |                      |                     | relevant studies (published and unpublished)             |               |
| 38 |                      |                     | examining benefits and harms for each intervention       |               |
| 39 |                      |                     |                                                          |               |
| 40 |                      |                     |                                                          |               |
| 41 |                      |                     |                                                          |               |
| 42 | Background and       | <a href="#">#6b</a> | Explanation for choice of comparators                    | 8-9           |
| 43 | rationale: choice of |                     |                                                          |               |
| 44 | comparators          |                     |                                                          |               |
| 45 |                      |                     |                                                          |               |
| 46 |                      |                     |                                                          |               |
| 47 | Objectives           | <a href="#">#7</a>  | Specific objectives or hypotheses                        | 9             |
| 48 |                      |                     |                                                          |               |
| 49 | Trial design         | <a href="#">#8</a>  | Description of trial design including type of trial (eg, | 9             |
| 50 |                      |                     | parallel group, crossover, factorial, single group),     |               |
| 51 |                      |                     | allocation ratio, and framework (eg, superiority,        |               |
| 52 |                      |                     | equivalence, non-inferiority, exploratory)               |               |
| 53 |                      |                     |                                                          |               |
| 54 |                      |                     |                                                          |               |
| 55 |                      |                     |                                                          |               |

**Methods:  
Participants,**

## interventions, and outcomes

|    |                      |                      |                                                              |
|----|----------------------|----------------------|--------------------------------------------------------------|
| 1  |                      |                      |                                                              |
| 2  |                      |                      |                                                              |
| 3  |                      |                      |                                                              |
| 4  | Study setting        | <a href="#">#9</a>   | Description of study settings (eg, community clinic, 9       |
| 5  |                      |                      | academic hospital) and list of countries where data          |
| 6  |                      |                      | will be collected. Reference to where list of study          |
| 7  |                      |                      | sites can be obtained                                        |
| 8  |                      |                      |                                                              |
| 9  |                      |                      |                                                              |
| 10 |                      |                      |                                                              |
| 11 | Eligibility criteria | <a href="#">#10</a>  | Inclusion and exclusion criteria for participants. If 10-11  |
| 12 |                      |                      | applicable, eligibility criteria for study centres and       |
| 13 |                      |                      | individuals who will perform the interventions (eg,          |
| 14 |                      |                      | surgeons, psychotherapists)                                  |
| 15 |                      |                      |                                                              |
| 16 |                      |                      |                                                              |
| 17 | Interventions:       | <a href="#">#11a</a> | Interventions for each group with sufficient detail to 11-12 |
| 18 | description          |                      | allow replication, including how and when they will          |
| 19 |                      |                      | be administered                                              |
| 20 |                      |                      |                                                              |
| 21 |                      |                      |                                                              |
| 22 |                      |                      |                                                              |
| 23 | Interventions:       | <a href="#">#11b</a> | Criteria for discontinuing or modifying allocated N/A        |
| 24 | modifications        |                      | interventions for a given trial participant (eg, drug        |
| 25 |                      |                      | dose change in response to harms, participant                |
| 26 |                      |                      | request, or improving / worsening disease)                   |
| 27 |                      |                      |                                                              |
| 28 |                      |                      |                                                              |
| 29 |                      |                      |                                                              |
| 30 | Interventions:       | <a href="#">#11c</a> | Strategies to improve adherence to intervention N/A          |
| 31 | adherence            |                      | protocols, and any procedures for monitoring                 |
| 32 |                      |                      | adherence (eg, drug tablet return; laboratory tests)         |
| 33 |                      |                      |                                                              |
| 34 |                      |                      |                                                              |
| 35 | Interventions:       | <a href="#">#11d</a> | Relevant concomitant care and interventions that N/A         |
| 36 | concomitant care     |                      | are permitted or prohibited during the trial                 |
| 37 |                      |                      |                                                              |
| 38 |                      |                      |                                                              |
| 39 | Outcomes             | <a href="#">#12</a>  | Primary, secondary, and other outcomes, including 13-14      |
| 40 |                      |                      | the specific measurement variable (eg, systolic              |
| 41 |                      |                      | blood pressure), analysis metric (eg, change from            |
| 42 |                      |                      | baseline, final value, time to event), method of             |
| 43 |                      |                      | aggregation (eg, median, proportion), and time               |
| 44 |                      |                      | point for each outcome. Explanation of the clinical          |
| 45 |                      |                      | relevance of chosen efficacy and harm outcomes               |
| 46 |                      |                      | is strongly recommended                                      |
| 47 |                      |                      |                                                              |
| 48 |                      |                      |                                                              |
| 49 |                      |                      |                                                              |
| 50 |                      |                      |                                                              |
| 51 | Participant timeline | <a href="#">#13</a>  | Time schedule of enrolment, interventions 15                 |
| 52 |                      |                      | (including any run-ins and washouts),                        |
| 53 |                      |                      | assessments, and visits for participants. A                  |
| 54 |                      |                      | schematic diagram is highly recommended (see                 |
| 55 |                      |                      | Figure)                                                      |
| 56 |                      |                      |                                                              |
| 57 |                      |                      |                                                              |
| 58 |                      |                      |                                                              |
| 59 |                      |                      |                                                              |
| 60 |                      |                      |                                                              |

|    |                           |                      |                                                        |              |
|----|---------------------------|----------------------|--------------------------------------------------------|--------------|
| 1  | Sample size               | <a href="#">#14</a>  | Estimated number of participants needed to             | 10           |
| 2  |                           |                      | achieve study objectives and how it was                |              |
| 3  |                           |                      | determined, including clinical and statistical         |              |
| 4  |                           |                      | assumptions supporting any sample size                 |              |
| 5  |                           |                      | calculations                                           |              |
| 6  |                           |                      |                                                        |              |
| 7  |                           |                      |                                                        |              |
| 8  |                           |                      |                                                        |              |
| 9  | Recruitment               | <a href="#">#15</a>  | Strategies for achieving adequate participant          | 10           |
| 10 |                           |                      | enrolment to reach target sample size                  |              |
| 11 |                           |                      |                                                        |              |
| 12 |                           |                      |                                                        |              |
| 13 | <b>Methods:</b>           |                      |                                                        |              |
| 14 | <b>Assignment of</b>      |                      |                                                        |              |
| 15 | <b>interventions (for</b> |                      |                                                        |              |
| 16 | <b>controlled trials)</b> |                      |                                                        |              |
| 17 |                           |                      |                                                        |              |
| 18 |                           |                      |                                                        |              |
| 19 |                           |                      |                                                        |              |
| 20 | Allocation: sequence      | <a href="#">#16a</a> | Method of generating the allocation sequence (eg,      | 10-11        |
| 21 | generation                |                      | computer-generated random numbers), and list of        |              |
| 22 |                           |                      | any factors for stratification. To reduce              |              |
| 23 |                           |                      | predictability of a random sequence, details of any    |              |
| 24 |                           |                      | planned restriction (eg, blocking) should be           |              |
| 25 |                           |                      | provided in a separate document that is                |              |
| 26 |                           |                      | unavailable to those who enrol participants or         |              |
| 27 |                           |                      | assign interventions                                   |              |
| 28 |                           |                      |                                                        |              |
| 29 |                           |                      |                                                        |              |
| 30 |                           |                      |                                                        |              |
| 31 |                           |                      |                                                        |              |
| 32 |                           |                      |                                                        |              |
| 33 | Allocation                | <a href="#">#16b</a> | Mechanism of implementing the allocation               | 11           |
| 34 | concealment               |                      | sequence (eg, central telephone; sequentially          |              |
| 35 | mechanism                 |                      | numbered, opaque, sealed envelopes), describing        |              |
| 36 |                           |                      | any steps to conceal the sequence until                |              |
| 37 |                           |                      | interventions are assigned                             |              |
| 38 |                           |                      |                                                        |              |
| 39 |                           |                      |                                                        |              |
| 40 |                           |                      |                                                        |              |
| 41 | Allocation:               | <a href="#">#16c</a> | Who will generate the allocation sequence, who         | N/A not been |
| 42 | implementation            |                      | will enrol participants, and who will assign           | decided      |
| 43 |                           |                      | participants to interventions                          |              |
| 44 |                           |                      |                                                        |              |
| 45 |                           |                      |                                                        |              |
| 46 | Blinding (masking)        | <a href="#">#17a</a> | Who will be blinded after assignment to                | 10           |
| 47 |                           |                      | interventions (eg, trial participants, care providers, |              |
| 48 |                           |                      | outcome assessors, data analysts), and how             |              |
| 49 |                           |                      |                                                        |              |
| 50 |                           |                      |                                                        |              |
| 51 |                           |                      |                                                        |              |
| 52 | Blinding (masking):       | <a href="#">#17b</a> | If blinded, circumstances under which unblinding is    | N/A          |
| 53 | emergency                 |                      | permissible, and procedure for revealing a             |              |
| 54 | unblinding                |                      | participant's allocated intervention during the trial  |              |
| 55 |                           |                      |                                                        |              |
| 56 |                           |                      |                                                        |              |
| 57 | <b>Methods: Data</b>      |                      |                                                        |              |
| 58 | <b>collection,</b>        |                      |                                                        |              |
| 59 |                           |                      |                                                        |              |
| 60 |                           |                      |                                                        |              |

1 **management, and**  
2 **analysis**

3

4 Data collection plan [#18a](#) Plans for assessment and collection of outcome, 13-15  
5 baseline, and other trial data, including any related  
6 processes to promote data quality (eg, duplicate  
7 6measurements, training of assessors) and a  
8 description of study instruments (eg,  
9 questionnaires, laboratory tests) along with their  
10 reliability and validity, if known. Reference to where  
11 data collection forms can be found, if not in the  
12 protocol  
13

14 Data collection plan: [#18b](#) Plans to promote participant retention and N/A not been  
15 retention complete follow-up, including list of any outcome  
16 data to be collected for participants who  
17 discontinued or deviate from intervention protocols  
18

19 Data management [#19](#) Plans for data entry, coding, security, and storage, 15  
20 including any related processes to promote data  
21 quality (eg, double data entry; range checks for  
22 data values). Reference to where details of data  
23 management procedures can be found, if not in the  
24 protocol  
25

26 Statistics: outcomes [#20a](#) Statistical methods for analysing primary and 17-18  
27 secondary outcomes. Reference to where other  
28 details of the statistical analysis plan can be found,  
29 if not in the protocol  
30

31 Statistics: additional [#20b](#) Methods for any additional analyses (eg, subgroup N/A  
32 analyses and adjusted analyses)  
33

34 Statistics: analysis [#20c](#) Definition of analysis population relating to protocol Not decided  
35 population and  
36 missing data non-adherence (eg, as randomised analysis), and  
37 any statistical methods to handle missing data (eg,  
38 multiple imputation)  
39  
40  
41

42 **Methods:**

43 **Monitoring**

44

45 Data monitoring: [#21a](#) Composition of data monitoring committee (DMC); N/A  
46 formal committee summary of its role and reporting structure;  
47  
48  
49

statement of whether it is independent from the sponsor and competing interests; and reference to where further details about its charter can be found, if not in the protocol. Alternatively, an explanation of why a DMC is not needed

|    |                      |                      |                                                        |
|----|----------------------|----------------------|--------------------------------------------------------|
| 1  |                      |                      |                                                        |
| 2  |                      |                      |                                                        |
| 3  |                      |                      |                                                        |
| 4  |                      |                      |                                                        |
| 5  |                      |                      |                                                        |
| 6  |                      |                      |                                                        |
| 7  |                      |                      |                                                        |
| 8  |                      |                      |                                                        |
| 9  | Data monitoring:     | <a href="#">#21b</a> | Description of any interim analyses and stopping       |
| 10 | interim analysis     |                      | guidelines, including who will have access to these    |
| 11 |                      |                      | interim results and make the final decision to         |
| 12 |                      |                      | terminate the trial                                    |
| 13 |                      |                      |                                                        |
| 14 |                      |                      |                                                        |
| 15 | Harms                | <a href="#">#22</a>  | Plans for collecting, assessing, reporting, and        |
| 16 |                      |                      | managing solicited and spontaneously reported          |
| 17 |                      |                      | adverse events and other unintended effects of         |
| 18 |                      |                      | trial interventions or trial conduct                   |
| 19 |                      |                      |                                                        |
| 20 |                      |                      |                                                        |
| 21 |                      |                      |                                                        |
| 22 | Auditing             | <a href="#">#23</a>  | Frequency and procedures for auditing trial            |
| 23 |                      |                      | conduct, if any, and whether the process will be       |
| 24 |                      |                      | independent from investigators and the sponsor         |
| 25 |                      |                      |                                                        |
| 26 |                      |                      |                                                        |
| 27 | <b>Ethics and</b>    |                      |                                                        |
| 28 | <b>dissemination</b> |                      |                                                        |
| 29 |                      |                      |                                                        |
| 30 |                      |                      |                                                        |
| 31 | Research ethics      | <a href="#">#24</a>  | Plans for seeking research ethics committee /          |
| 32 | approval             |                      | institutional review board (REC / IRB) approval        |
| 33 |                      |                      |                                                        |
| 34 |                      |                      |                                                        |
| 35 | Protocol             | <a href="#">#25</a>  | Plans for communicating important protocol             |
| 36 | amendments           |                      | modifications (eg, changes to eligibility criteria,    |
| 37 |                      |                      | outcomes, analyses) to relevant parties (eg,           |
| 38 |                      |                      | investigators, REC / IRBs, trial participants, trial   |
| 39 |                      |                      | registries, journals, regulators)                      |
| 40 |                      |                      |                                                        |
| 41 |                      |                      |                                                        |
| 42 |                      |                      |                                                        |
| 43 | Consent or assent    | <a href="#">#26a</a> | Who will obtain informed consent or assent from        |
| 44 |                      |                      | potential trial participants or authorised surrogates, |
| 45 |                      |                      | and how (see Item 32)                                  |
| 46 |                      |                      |                                                        |
| 47 |                      |                      |                                                        |
| 48 |                      |                      |                                                        |
| 49 | Consent or assent:   | <a href="#">#26b</a> | Additional consent provisions for collection and use   |
| 50 | ancillary studies    |                      | of participant data and biological specimens in        |
| 51 |                      |                      | ancillary studies, if applicable                       |
| 52 |                      |                      |                                                        |
| 53 |                      |                      |                                                        |
| 54 | Confidentiality      | <a href="#">#27</a>  | How personal information about potential and           |
| 55 |                      |                      | enrolled participants will be collected, shared, and   |
| 56 |                      |                      | maintained in order to protect confidentiality         |
| 57 |                      |                      | before, during, and after the trial                    |
| 58 |                      |                      |                                                        |
| 59 |                      |                      |                                                        |
| 60 |                      |                      |                                                        |

|    |                       |                      |                                                        |                 |
|----|-----------------------|----------------------|--------------------------------------------------------|-----------------|
| 1  | Declaration of        | <a href="#">#28</a>  | Financial and other competing interests for            | 20              |
| 2  | interests             |                      | principal investigators for the overall trial and each |                 |
| 3  |                       |                      | study site                                             |                 |
| 4  |                       |                      |                                                        |                 |
| 5  |                       |                      |                                                        |                 |
| 6  | Data access           | <a href="#">#29</a>  | Statement of who will have access to the final trial   | 19, has been    |
| 7  |                       |                      | dataset, and disclosure of contractual agreements      | informed to the |
| 8  |                       |                      | that limit such access for investigators               | ethics review   |
| 9  |                       |                      |                                                        | board           |
| 10 |                       |                      |                                                        |                 |
| 11 |                       |                      |                                                        |                 |
| 12 |                       |                      |                                                        |                 |
| 13 | Ancillary and post    | <a href="#">#30</a>  | Provisions, if any, for ancillary and post-trial care, | None            |
| 14 | trial care            |                      | and for compensation to those who suffer harm          |                 |
| 15 |                       |                      | from trial participation                               |                 |
| 16 |                       |                      |                                                        |                 |
| 17 |                       |                      |                                                        |                 |
| 18 | Dissemination policy: | <a href="#">#31a</a> | Plans for investigators and sponsor to                 | 20              |
| 19 | trial results         |                      | communicate trial results to participants,             |                 |
| 20 |                       |                      | healthcare professionals, the public, and other        |                 |
| 21 |                       |                      | relevant groups (eg, via publication, reporting in     |                 |
| 22 |                       |                      | results databases, or other data sharing               |                 |
| 23 |                       |                      | arrangements), including any publication               |                 |
| 24 |                       |                      | restrictions                                           |                 |
| 25 |                       |                      |                                                        |                 |
| 26 |                       |                      |                                                        |                 |
| 27 |                       |                      |                                                        |                 |
| 28 |                       |                      |                                                        |                 |
| 29 |                       |                      |                                                        |                 |
| 30 | Dissemination policy: | <a href="#">#31b</a> | Authorship eligibility guidelines and any intended     | 20              |
| 31 | authorship            |                      | use of professional writers                            |                 |
| 32 |                       |                      |                                                        |                 |
| 33 |                       |                      |                                                        |                 |
| 34 | Dissemination policy: | <a href="#">#31c</a> | Plans, if any, for granting public access to the full  | None            |
| 35 | reproducible          |                      | protocol, participant-level dataset, and statistical   |                 |
| 36 | research              |                      | code                                                   |                 |
| 37 |                       |                      |                                                        |                 |
| 38 |                       |                      |                                                        |                 |
| 39 | <b>Appendices</b>     |                      |                                                        |                 |
| 40 |                       |                      |                                                        |                 |
| 41 | Informed consent      | <a href="#">#32</a>  | Model consent form and other related                   | An example is   |
| 42 | materials             |                      | documentation given to participants and authorised     | provided        |
| 43 |                       |                      | surrogates                                             |                 |
| 44 |                       |                      |                                                        |                 |
| 45 |                       |                      |                                                        |                 |
| 46 |                       |                      |                                                        |                 |
| 47 | Biological specimens  | <a href="#">#33</a>  | Plans for collection, laboratory evaluation, and       | N/A             |
| 48 |                       |                      | storage of biological specimens for genetic or         |                 |
| 49 |                       |                      | molecular analysis in the current trial and for future |                 |
| 50 |                       |                      | use in ancillary studies, if applicable                |                 |
| 51 |                       |                      |                                                        |                 |
| 52 |                       |                      |                                                        |                 |

None The SPIRIT checklist is distributed under the terms of the Creative Commons Attribution License CC-BY-ND 3.0. This checklist can be completed online using <https://www.goodreports.org/>, a tool made by the [EQUATOR Network](#) in collaboration with [Penelope.ai](#)
